# Supplementary material for: EPR spectroscopic characterisation of native CuII-binding sites in human serum albumin
Source: Royal Society of Chemistry journal article supplement (doi:10.1039/d4dt00892h), 2024-01-01
Supplement: d4dt00892h1.pdf [file d4dt00892h1.pdf]

## Supplementary Information

### EPR spectroscopic characterisation of native Cu<sup>II</sup>-binding sites in human serum albumin

*Katrin Ackermann,<sup>a</sup> Dongmei Wu,<sup>b</sup> Alan J. Stewart,<sup>b\*</sup> Bela E. Bode<sup>a\*</sup>*

<sup>a</sup>EaStCHEM School of Chemistry, Biomedical Sciences Research Complex, and Centre of Magnetic Resonance, University of St Andrews, St Andrews, KY16 9ST, Scotland; <sup>b</sup>School of Medicine, Biomedical Sciences Research Complex, and Centre of Magnetic Resonance, University of St Andrews, St Andrews, KY16 9TF, Scotland



| Oligo name        | Sequence 5'----3' (length in bases)               |
|-------------------|---------------------------------------------------|
| His3Ala forward   | CTCGAGAAAAGAGATGCTGCCAAGTCTGAAGTCGCTCACAGA (42)   |
| His3Ala reverse   | TCTGTGAGCGACTTCAGACTTGGCAGCATCTCTTTTCTCGAG (42)   |
| His9Ala forward   | GCTCACAAGTCTGAAGTCGCTGCCAGATTTAAAGACCTTGGT (42)   |
| His9Ala reverse   | ACCAAGGTCTTTAAATCTGGCAGCGACTTCAGACTTGTGAGC (42)   |
| His67Ala forward  | GAGAATTGCGATAAGTCTCTTGCTACACTTTTCGGCGATAAG (42)   |
| His67Ala reverse  | CTTATCGCCGAAAAGTGTAGCAAGAGACTTATCGCAATTCTC (42)   |
| His247Ala forward | GTCCATACTGAATGCTGTGCTGGAGACTTATTGGAATGTGCC (42)   |
| His247Ala reverse | GGCACATTCCAATAAGTCTCCAGCACAGCATTAGTATGGAC (42)    |
| His288Ala forward | GCCATTGTTGGAAAAGTCCGCTTGCATAGCTGAGGTAGAGAATG (44) |
| His288Ala reverse | CATTCTCTACCTCAGCTATGCAAGCGGACTTTTCCAACAATGGC (44) |
| $\alpha$ -factor  | TACTATTGCCAGCATTGCTGC                             |
| 5' AOX1           | GACTGGTTCCAATTGACAAGC                             |
| 3' AOX1           | GCAAATGGCATTCTGACATCC                             |

**Table S1.** Primers used for site-directed mutagenesis and DNA sequencing from yeast.

| Construct  | [albumin] $\mu\text{M}$ | [Cu(II)] $\mu\text{M}$ | Protonated | Deuterated |
|------------|-------------------------|------------------------|------------|------------|
| WT         | 250                     | 0                      | X          |            |
| WT         | 250                     | 125 (0.5 eq.)          | X          |            |
| WT         | 250                     | 250 (1.0 eq.)          | X          |            |
| WT         | 250                     | 375 (1.5 eq.)          | X          |            |
| WT         | 250                     | 500 (2.0 eq.)          | X          |            |
| WT         | 250                     | 625 (2.5 eq.)          | X          |            |
| WT         | 250                     | 750 (3.0 eq.)          | X          |            |
| WT         | 250                     | 1000 (4.0 eq.)         | X          |            |
| WT         | 250                     | 1250 (5.0 eq.)         | X          |            |
| WT         | 250                     | 0                      |            | X          |
| WT         | 250                     | 125 (0.5 eq.)          |            | X          |
| WT         | 250                     | 250 (1.0 eq.)          |            | X          |
| WT         | 250                     | 375 (1.5 eq.)          |            | X          |
| WT         | 250                     | 500 (2.0 eq.)          |            | X          |
| WT         | 250                     | 625 (2.5 eq.)          |            | X          |
| WT         | 250                     | 750 (3.0 eq.)          |            | X          |
| WT         | 250                     | 1000 (4.0 eq.)         |            | X          |
| WT         | 250                     | 1250 (5.0 eq.)         |            | X          |
| rHSA H3A   | 241                     | 217 (0.9 eq.)          | X          |            |
| rHSA WT    | 250                     | 500 (2.0 eq.)          |            | X          |
| rHSA H3A   | 250                     | 500 (2.0 eq.)          |            | X          |
| rHSA H9A   | 250                     | 500 (2.0 eq.)          |            | X          |
| rHSA H67A  | 250                     | 500 (2.0 eq.)          |            | X          |
| rHSA H247A | 250                     | 500 (2.0 eq.)          |            | X          |
| rHSA H288A | 250                     | 500 (2.0 eq.)          |            | X          |

**Table S2.** Detailed sample list for EPR measurements. WT = wild-type (plasma-purified); rHSA = recombinant human serum albumin; all mutant HSA variants were produced recombinantly.

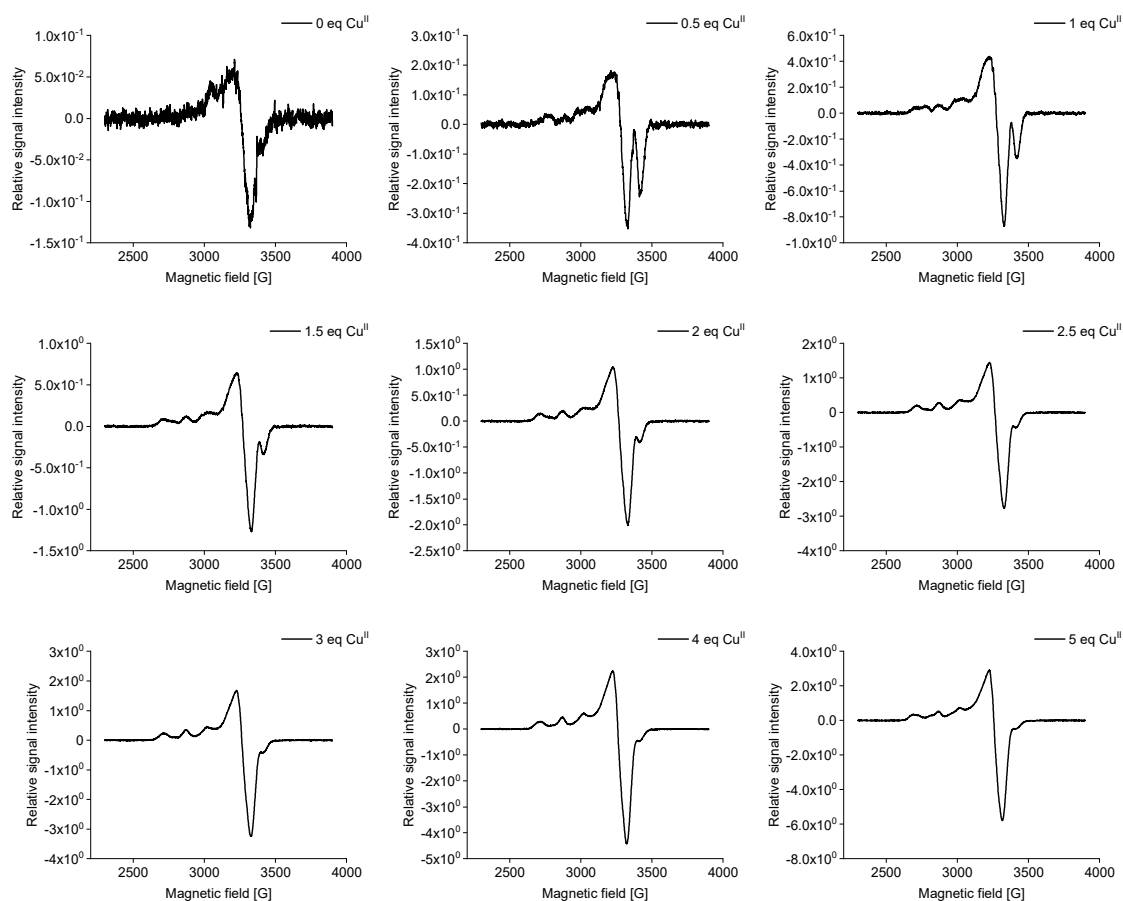

**Figure S2.** Individual CW EPR spectra of the HSA pseudo-titration series with 0 to 5 molar equivalents of  $\text{Cu}^{\text{II}}$  added.

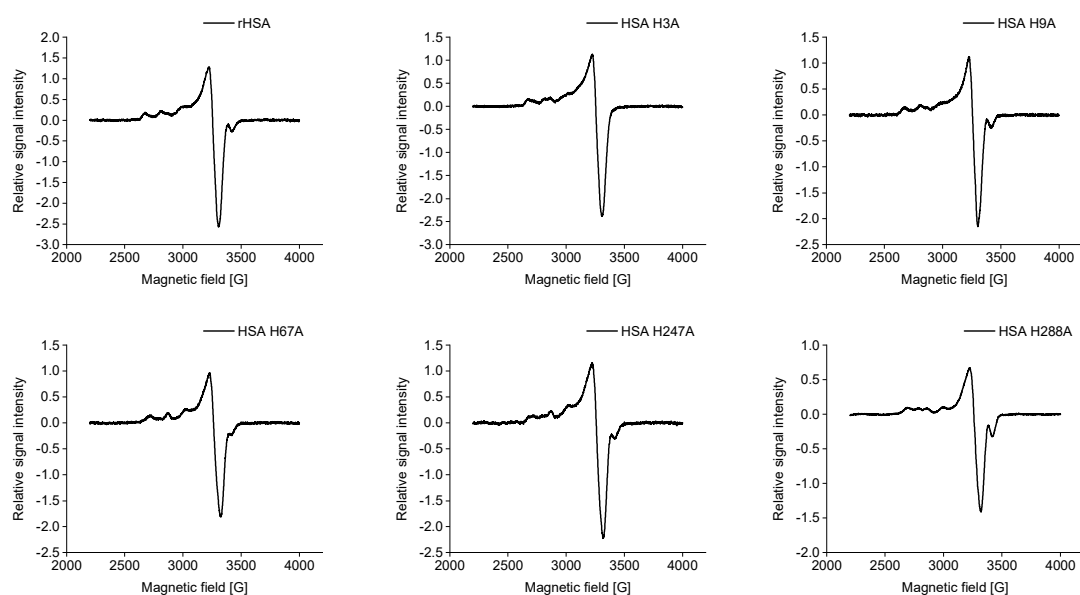

**Figure S3.** Individual CW EPR spectra of the recombinant HSA series with 2 molar equivalents of  $\text{Cu}^{\text{II}}$  added. The respective mutant variant is indicated on each plot. Note the absence of the H3 spectral feature at  $\sim 3420$  G in the H3A mutant. rHSA = wild-type recombinant HSA.

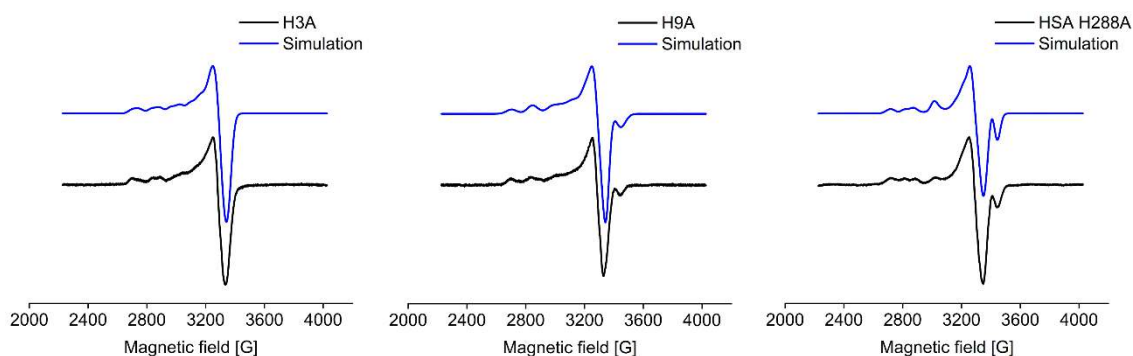

**Figure S4.** Experimental (black) and simulated (blue) CW spectra for the H3A (left), H9A (middle) and H288A (right) mutant of HSA. Corresponding simulation parameters are given below in **Table S3**.

| Spectrum        | H3A         |              | H288A       |              | H9A          |              |
|-----------------|-------------|--------------|-------------|--------------|--------------|--------------|
| Component       | 1           | 2            | 1           | 2            | 1            | 2            |
| Centre          | H288        | H9           | H9          | H3           | H288         | H3           |
| g <sub>11</sub> | 2.0447 (31) | 2.0486 (136) | 2.0558 (25) | 2.0391 (87)  | 2.0527 (77)  | 2.0385 (47)  |
| g <sub>22</sub> | 2.0602 (48) | 2.0844 (21)  | 2.0560 (25) | 2.0851 (105) | 2.0636 (97)  | 2.1121 (186) |
| g <sub>33</sub> | 2.3420 (17) | 2.2979 (38)  | 2.3063 (75) | 2.1840 (150) | 2.3341 (520) | 2.1647 (59)  |
| A <sub>11</sub> | 43 (19)     | 7 (109)      | 16 (51)     | 8 (75)       | 43 (33)      | 8 (42)       |
| A <sub>22</sub> | 25 (35)     | 8 (99)       | 15 (50)     | 7 (98)       | 27 (30)      | 7 (121)      |
| A <sub>33</sub> | 424 (46)    | 430 (13)     | 483 (50)    | 605 (50)     | 438 (14)     | 556 (26)     |
| Linewidth       | 5.6         | 5.97         | 6.9         | 4.0          | 4.84         | 8.2          |
| Weight          | 0.514       | 0.486        | 0.73        | 0.27         | 0.70         | 0.30         |

**Table S3.** CW EPR simulation parameters for spectra shown in **Figure S4** above. A values are given in MHz and rounded, values for the linewidth are given in mT, the numbers in brackets are the strain corresponding to the inhomogeneous broadening for the respective parameter. A and g values were anti-correlated (-1) for all components.

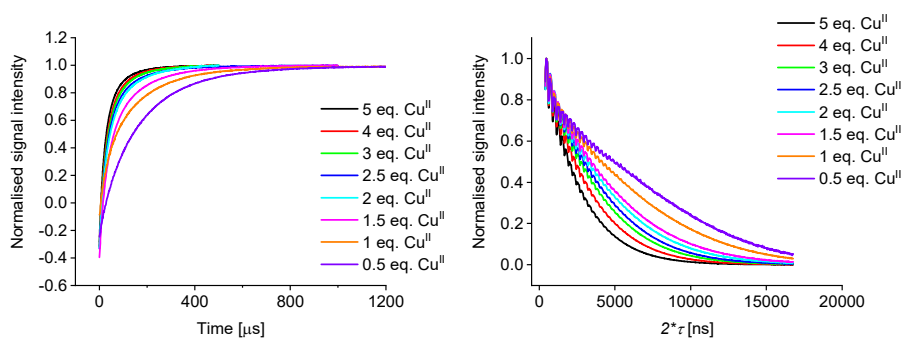

**Figure S5.** Three-pulse inversion recovery experiments (left) and two-pulse echo decay experiments (right) for samples of the pseudo-titration series to estimate longitudinal relaxation times and transverse dephasing times, respectively (see Table S3).

| Eq. Cu <sup>II</sup> | T <sub>1</sub>      | T <sub>1</sub>      | 1/e time | ½ × 1/e <sup>2</sup> time | T <sub>2</sub> | 1/e time | ½ × 1/e <sup>2</sup> time |
|----------------------|---------------------|---------------------|----------|---------------------------|----------------|----------|---------------------------|
|                      | τ <sub>1</sub> , μs | τ <sub>2</sub> , μs | μs       | μs                        | μs             | μs       | μs                        |
| 0.5                  | 216                 | 78                  | 72       | 107                       | 18.9           | 4.1      | 3.3                       |
| 1.0                  | 182                 | 39                  | 32       | 81                        | 3.7            | 3.4      | 2.9                       |
| 1.5                  | 138                 | 30                  | 33       | 61                        | 2.5            | 2.8      | 2.4                       |
| 2.0                  | 105                 | 26                  | 25       | 44                        | 2.3            | 2.6      | 2.2                       |
| 2.5                  | 111                 | 27                  | 23       | 39                        | 2.1            | 2.4      | 2.0                       |
| 3.0                  | 84                  | 23                  | 21       | 35                        | 1.9            | 2.2      | 1.8                       |
| 4.0                  | 77                  | 22                  | 20       | 32                        | 1.6            | 1.9      | 1.6                       |
| 5.0                  | 67                  | 19                  | 16       | 28                        | 1.2            | 1.5      | 1.4                       |

**Table S4.** Estimated T<sub>1</sub> values under the biexponential approximation and T<sub>2</sub> (~T<sub>m</sub>) values under the stretched exponential approximation, including respective 1/e and ½ × 1/e<sup>2</sup> times. Note the substantial difference in relaxation times between the 0.5 molar equivalents of Cu<sup>II</sup> and the higher Cu<sup>II</sup> load samples.

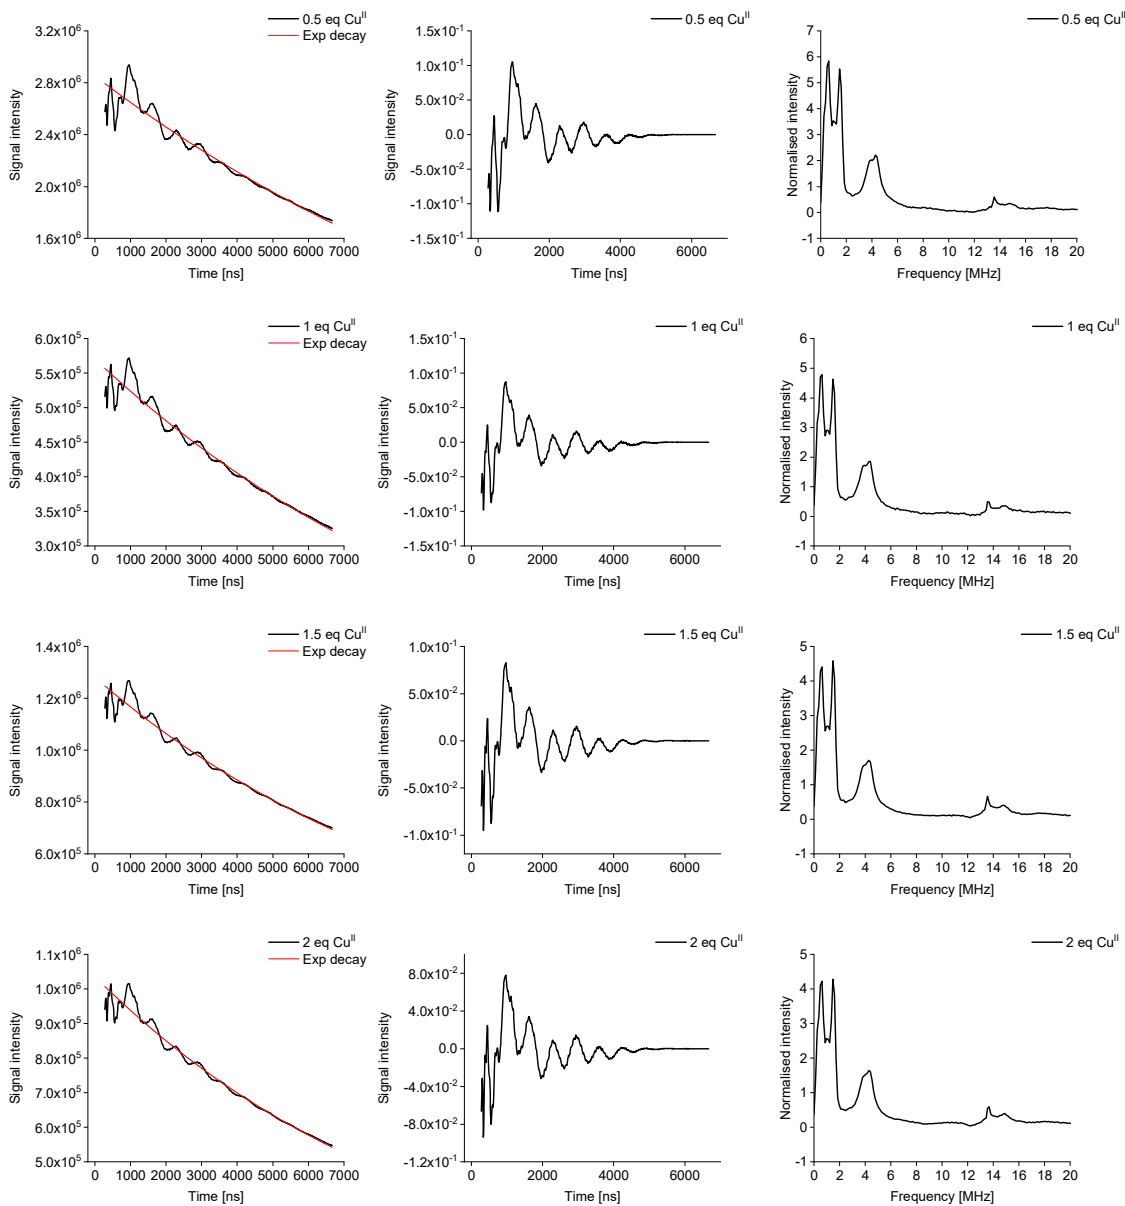

**Figure S6.** Individual ESEEM spectra of the pseudo-titration series with 0.5 to 5.0 molar equivalents of  $\text{Cu}^{\text{II}}$  added. Shown are the raw ESEEM traces (black) with fitted exponential background decay (red, left), the background-corrected traces (middle), and the corresponding absolute (magnitude) spectra after FFT (right).



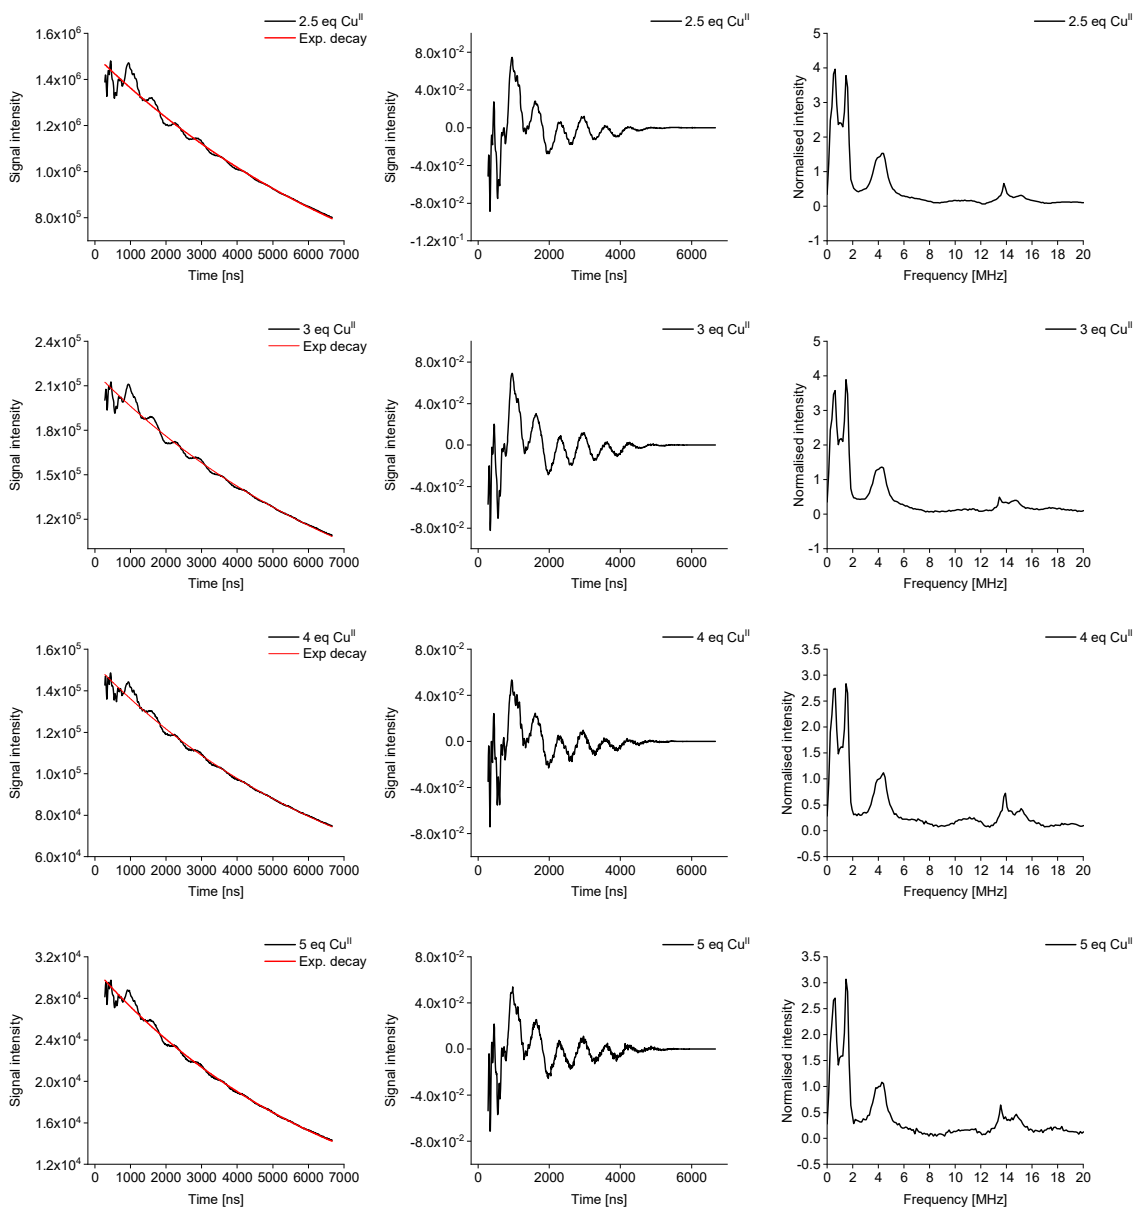

**Figure S6, continued.** Individual ESEEM spectra of the pseudo-titration series with 0.5 to 5.0 molar equivalents of Cu<sup>II</sup> added. Shown are the raw ESEEM traces (black) with fitted exponential background decay (red, left), the background-corrected traces (middle), and the corresponding absolute (magnitude) spectra after FFT (right).

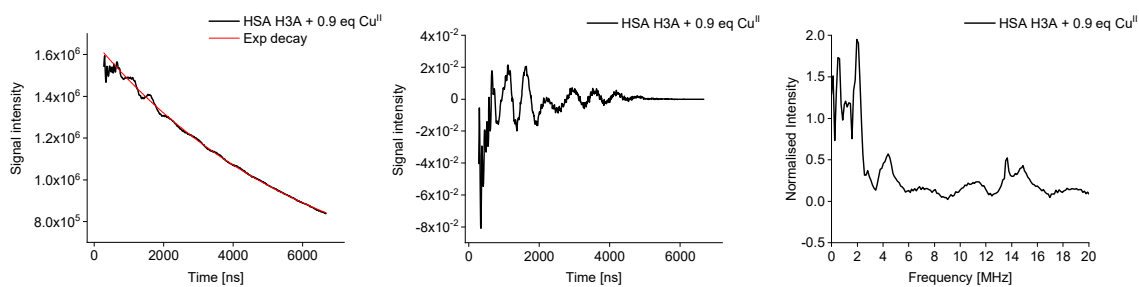

**Figure S7.** ESEEM spectrum of the protonated HSA H3A mutant with 0.9 molar equivalents of  $\text{Cu}^{\text{II}}$  added. NQI and DQ peaks are clearly visible, indicating a histidine environment for the  $\text{Cu}^{\text{II}}$  coordination. Shown is the raw ESEEM trace (black) with fitted exponential background decay (red, left), the background-corrected trace (middle), and the corresponding absolute (magnitude) spectrum after FFT (right).

HYSCORE with 0.5 molar equivalents of  $\text{Cu}^{\text{II}}$ :

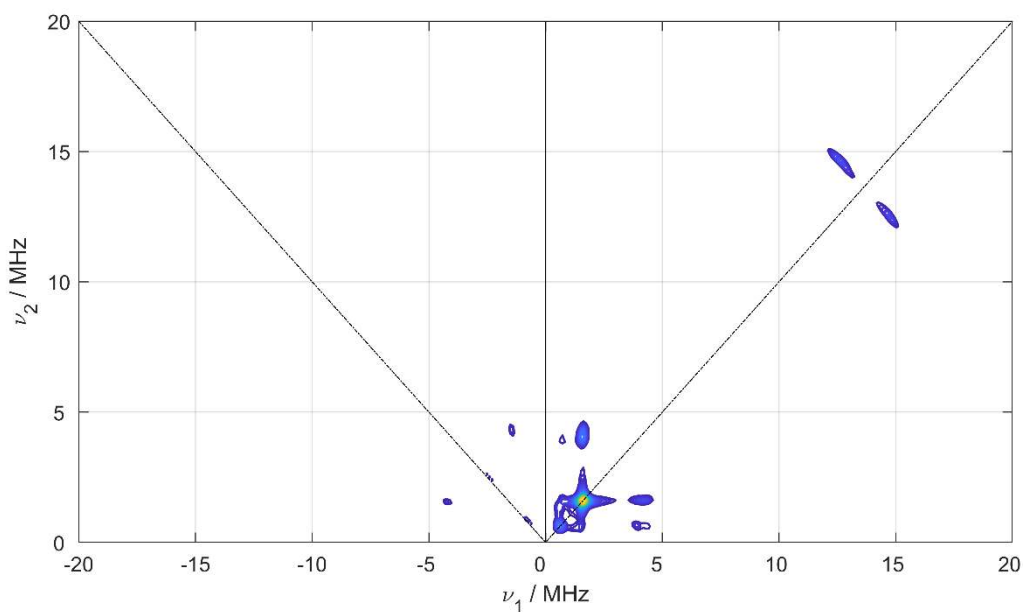

**Figure S8.** Individual HYSCORE spectra of the pseudo-titration series. From top to bottom: 0.5 / 1.0 / 1.5 / 2.0 / 2.5 / 3.0 / 4.0 / 5.0 molar equivalents of  $\text{Cu}^{\text{II}}$ .

HYSCORE with 1.0 molar equivalent of Cu<sup>II</sup>:

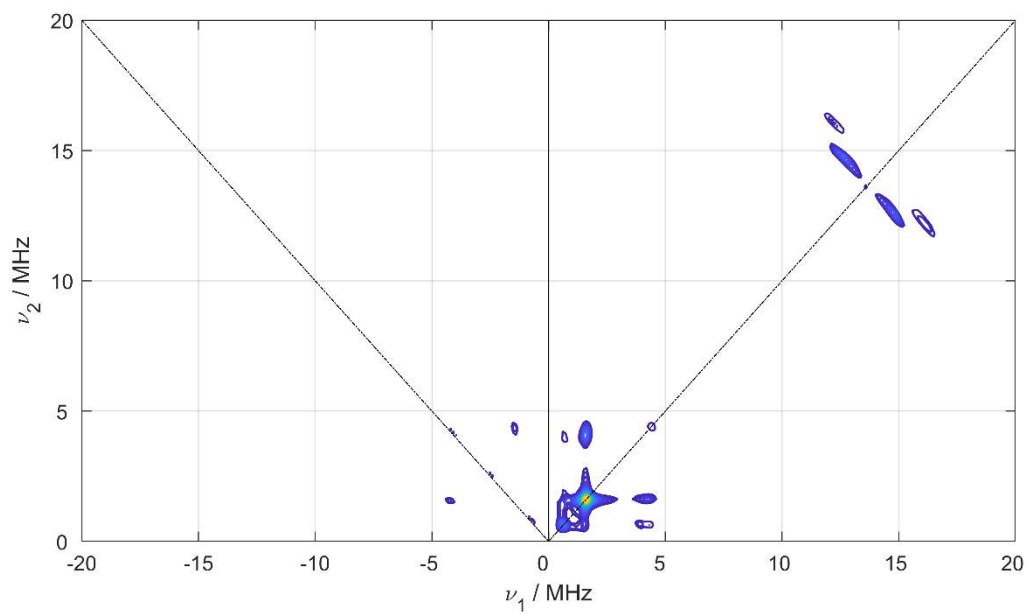

HYSCORE with 1.5 molar equivalent of Cu<sup>II</sup>:

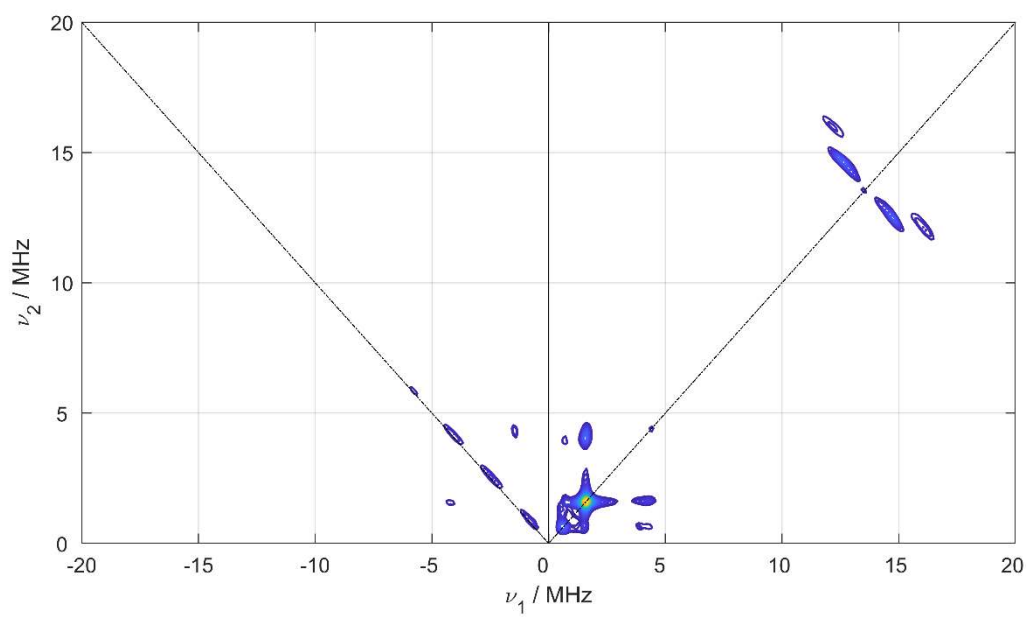

**Figure S8, continued.** Individual HYSCORE spectra of the pseudo-titration series. From top to bottom: 0.5 / 1.0 / 1.5 / 2.0 / 2.5 / 3.0 / 4.0 / 5.0 molar equivalents of Cu<sup>II</sup>.

HYSCORE with 2.0 molar equivalent of Cu<sup>II</sup>:

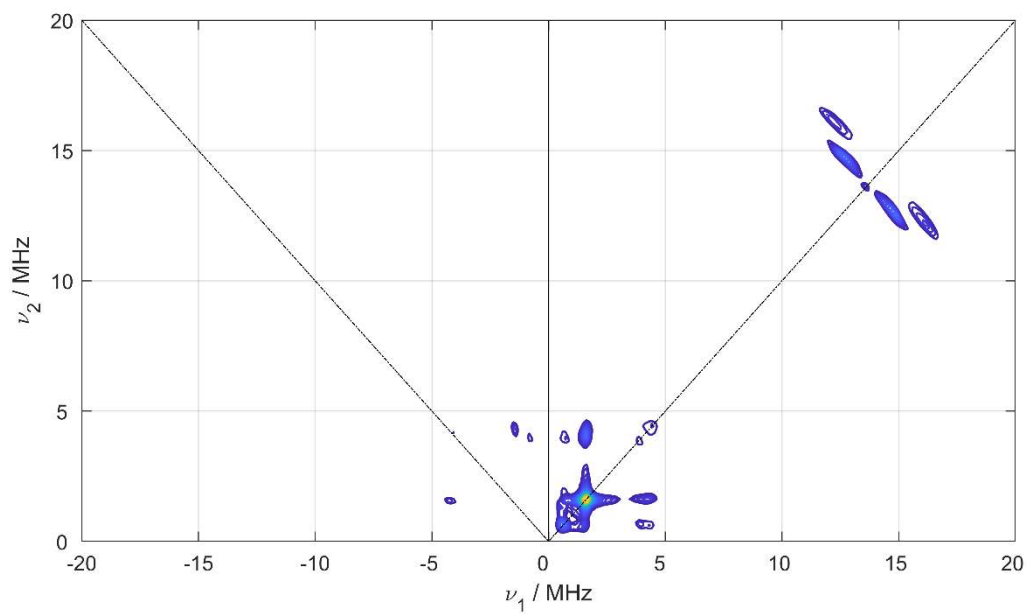

HYSCORE with 2.5 molar equivalent of Cu<sup>II</sup>:

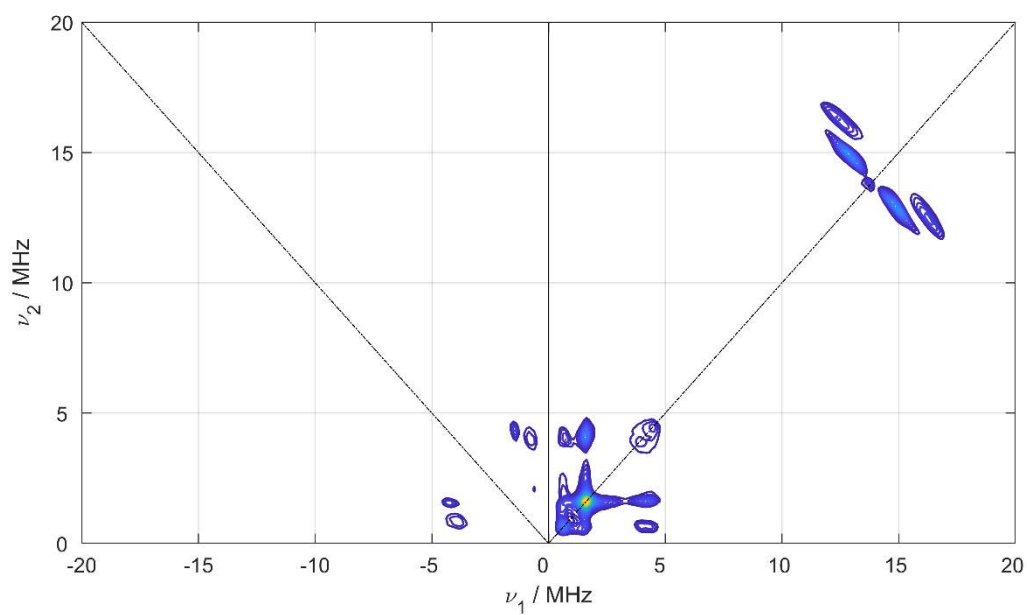

**Figure S8, continued.** Individual HYSCORE spectra of the pseudo-titration series. From top to bottom: 0.5 / 1.0 / 1.5 / 2.0 / 2.5 / 3.0 / 4.0 / 5.0 molar equivalents of Cu<sup>II</sup>.

HYSCORE with 3.0 molar equivalent of Cu<sup>II</sup>:

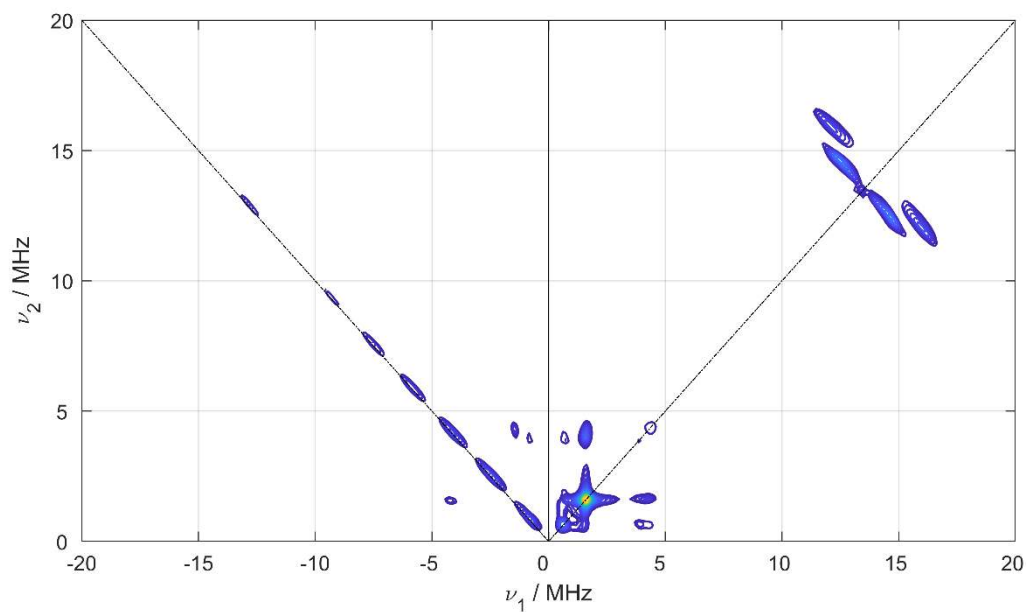

HYSCORE with 4.0 molar equivalent of Cu<sup>II</sup>:

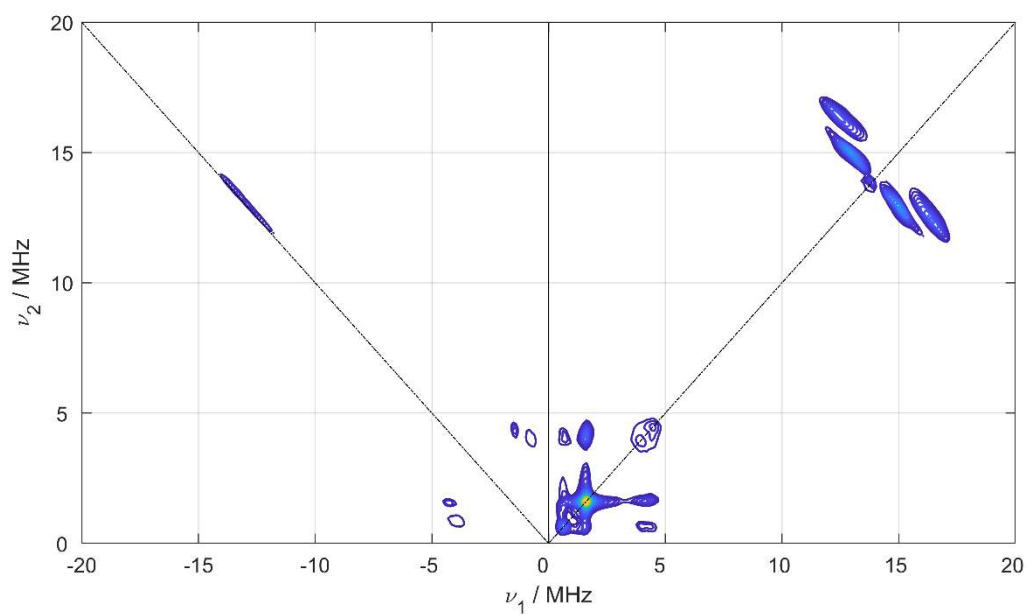

**Figure S8, continued.** Individual HYSCORE spectra of the pseudo-titration series. From top to bottom: 0.5 / 1.0 / 1.5 / 2.0 / 2.5 / 3.0 / 4.0 / 5.0 molar equivalents of Cu<sup>II</sup>.

HYSCORE with 5.0 molar equivalent of Cu<sup>II</sup>:

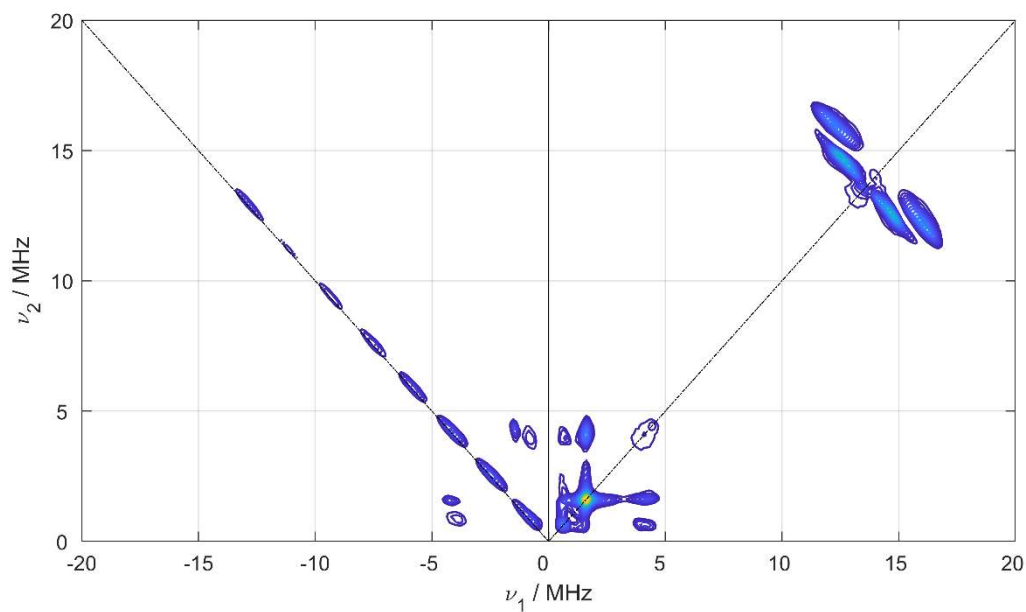

**Figure S8, continued.** Individual HYSCORE spectra of the pseudo-titration series. From top to bottom: 0.5 / 1.0 / 1.5 / 2.0 / 2.5 / 3.0 / 4.0 / 5.0 molar equivalents of Cu<sup>II</sup>.

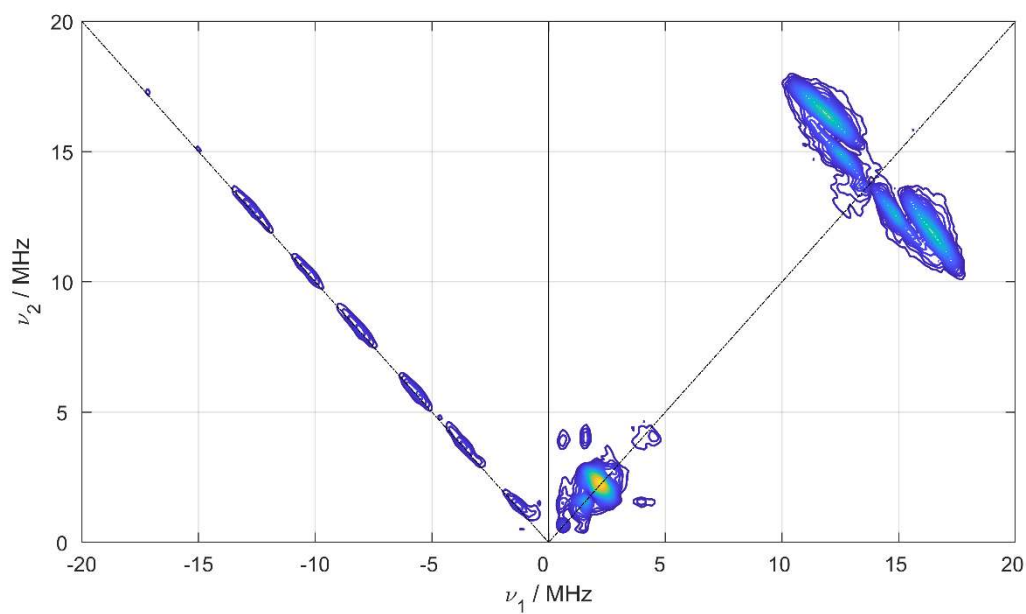

**Figure S9.** HYSCORE spectrum of the protonated HSA H3A mutant with 0.9 molar equivalents of Cu<sup>II</sup> added.

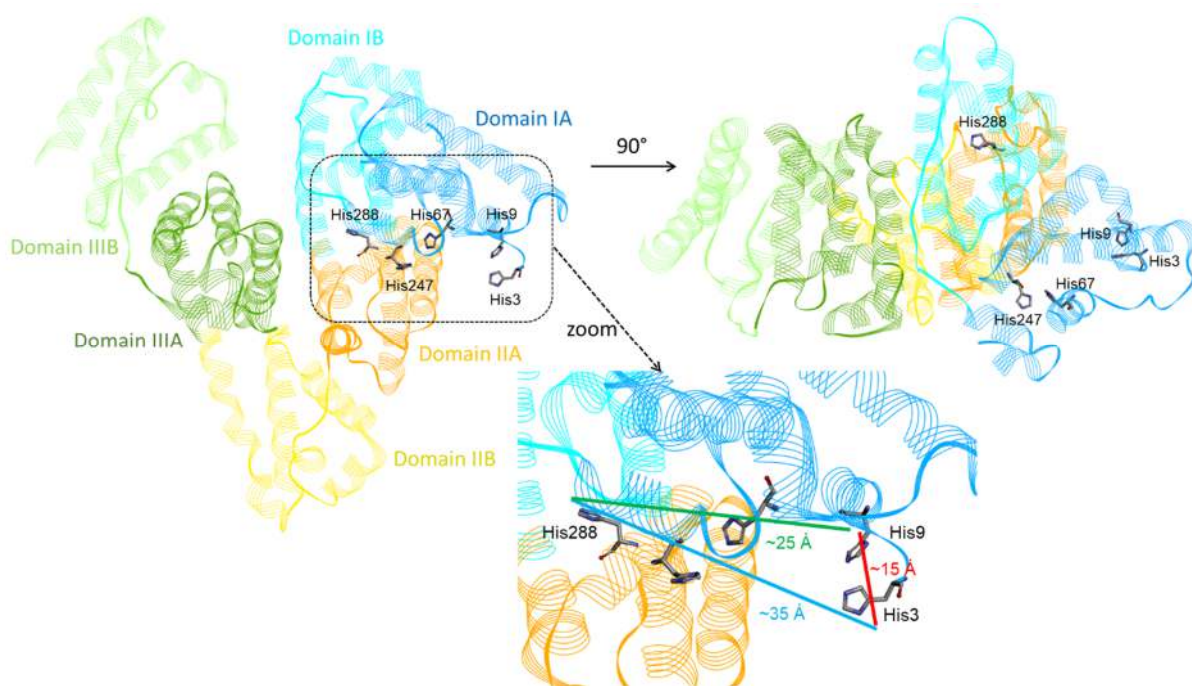

**Figure S10.** Structure of HSA showing locations of studied histidine residues. Individual sub-domains are highlighted by colour. The structure shown on the right is rotated by 90 degrees relative to the structure on the left, providing the view from above. Cartoons were drawn from structural coordinates obtained from the RSCB Protein Data Bank (PDB ID: 5IJF). Note that the sidechains of His3 and His9 were partially missing in the x-ray structure and were modelled using Discovery Studio Visualizer v24.1.0.23298 (Dassault Systèmes Biova Corp.). The inset shows the enlarged histidine-triangle involved in Cu<sup>II</sup>-binding of HSA, with His3 as primary and His9 and His288 as secondary sites, based on affinity; approximate distances between the sites as estimated from RIDME measurements are indicated.

| Sample     | CDA2.0 report name                                                  |
|------------|---------------------------------------------------------------------|
| rHSA WT    | 230215_KAq205.3_RIDME_20_50_50000_comparative_DEER_analyzer_report  |
| rHSA H3A   | 230215_KAq205.6_RIDME_18_36_36000_comparative_DEER_analyzer_report  |
| rHSA H9A   | 230216_KAq205.9_RIDME_28_67_67000_comparative_DEER_analyzer_report  |
| rHSA H67A  | 230217_KAq205.15_RIDME_28_57_57000_comparative_DEER_analyzer_report |
| rHSA H247A | 230216_KAq205.12_RIDME_26_55_55000_comparative_DEER_analyzer_report |
| rHSA H288A | 230618_BEBQ82.6_RIDME_comparative_DEER_analyzer_report              |

**Table S5.** CDA2.0 report names for RIDME measurements, see appendix for full reports.

# **DEER analysis report on dataset 230215\_KAq205.3\_RIDME\_20\_50\_50000**

**DEERNet Spinach SVN Rev 5662 and DeerLab  
0.9.1 Tikhonov regularization**

**ComparativeDEERAnalyzer version 2.0**

see: S. G. Worswick et al., DOI: 10.1126/sciadv.aat5218, L. Fabregas Ibanez et al., DOI: 10.5194/  
mr-1-209-2020

02-Mar-2023 14:04:46



---

## 1. Distance distributions

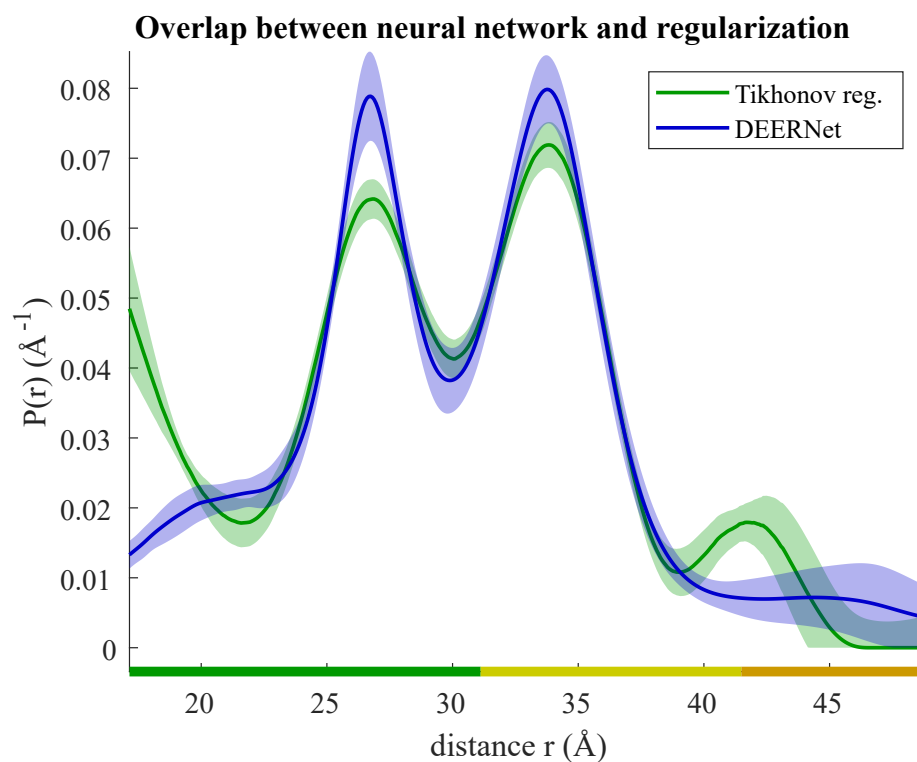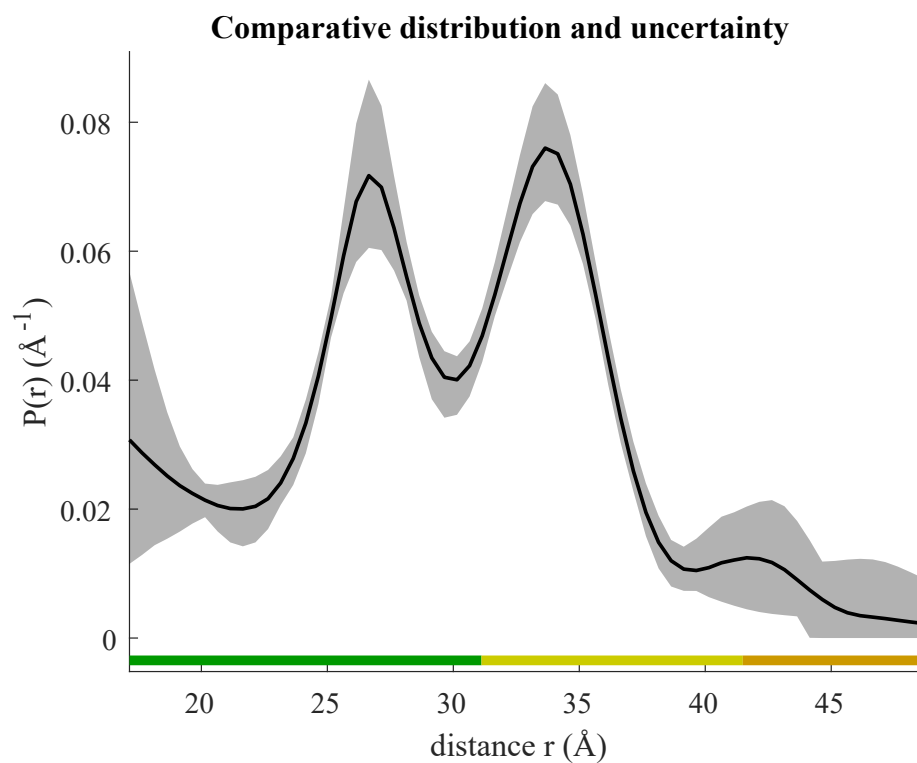

---

## 2. Fits of time-domain data

### DEERNet fits and background fits

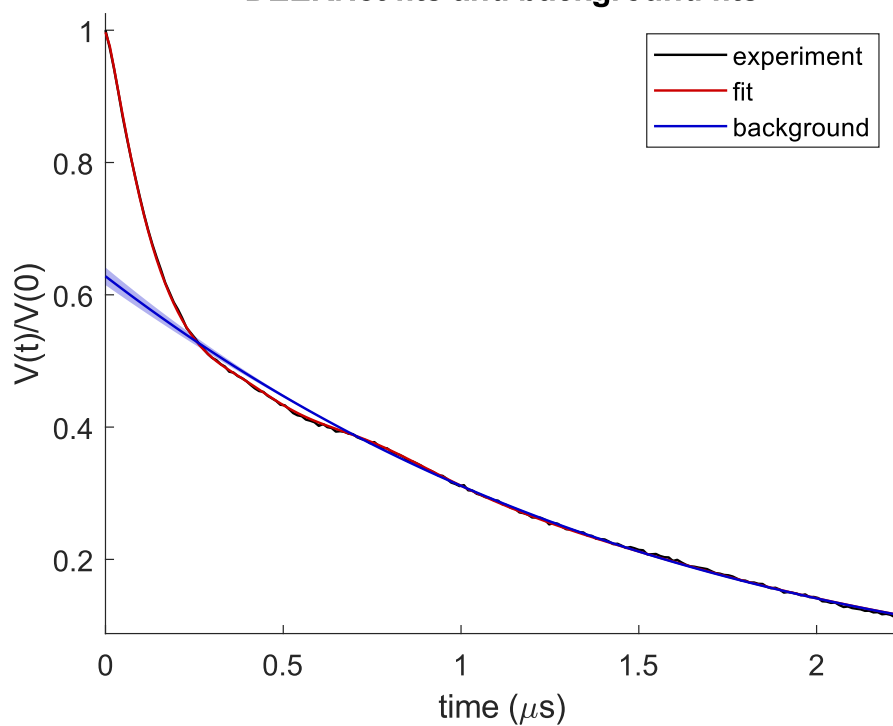

### Tikhonov fit

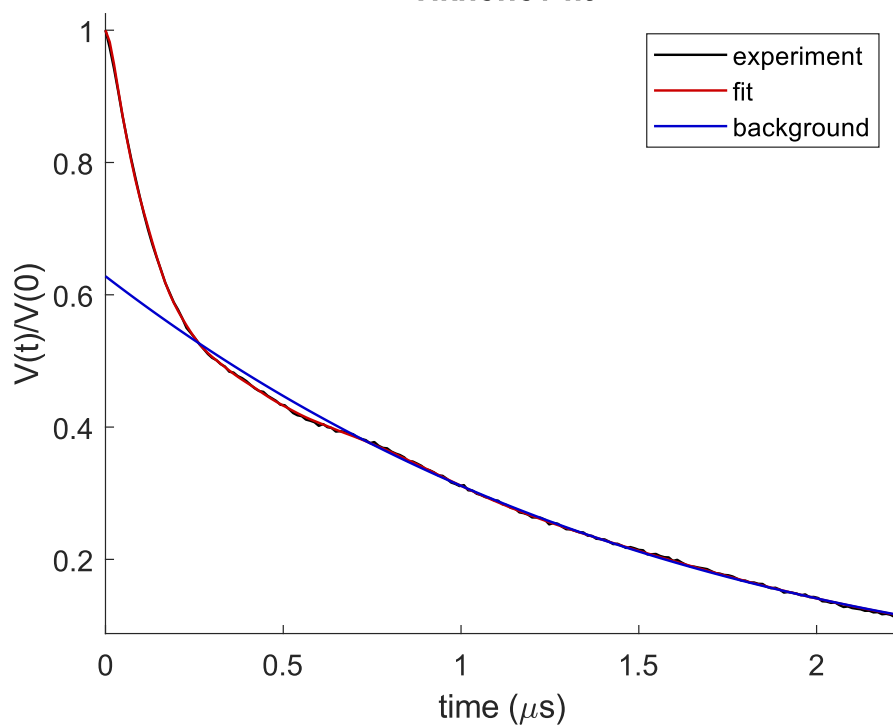

## 2. Fits of time-domain data

---

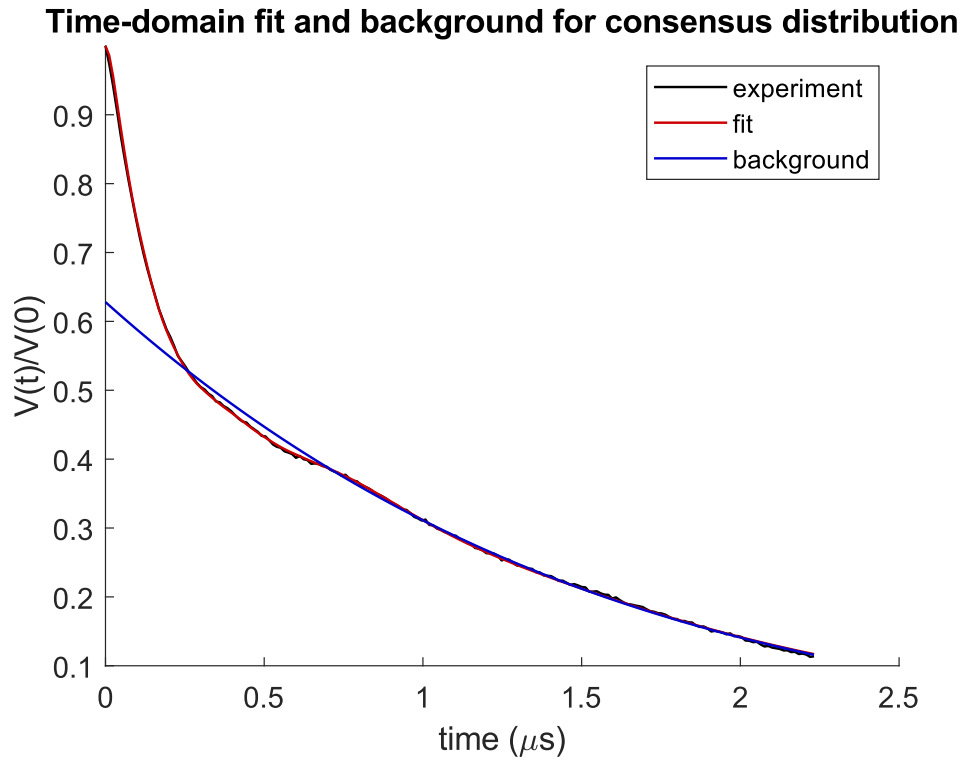

---

### 3. Experimental and processing parameters

**RIDME processing was requested. Only DEERNet output.**

Modulation depth: 0.370

Signal-to-noise ratio: 188.1 (w.r.t. modulation)

Noise estimates normalized to maximum signal

From imaginary part: 0.00000

From DEERNet fit: 0.00197

From Tikhonov fit: 0.00217

Zero time: 8 ns

Maximum time: 2232 ns

Time increment: 12 ns

Phase: 0.0 degree

Ensemble of 32 neural networks

Background separation by neural network

Background dimension: 3

Regularization parameter by best overlap with neural network solution

Regularization parameter used: 2.24

Reg. par. initial estimate by L-curve corner: 1.58

Overlap between DEERNet and regularization solutions: 0.909

Predicted overlap of consensus solution with ground truth: 0.78...0.95

Mean distance: 29.5 Å

Distance standard deviation: 7.1 Å

Full data set in Matlab format: C:\Users\ka44\Documents\OneDrive - University of St Andrews\StAndrews\Work\BEB\Projects\Albumin\HSA\_EPR\HSA\_Q\KAq205\205\230215\_KAq205.3\_RIDME\_20\_50\_50000\_comparative\_DEER\_analysis.mat

Distance distributions in text format: C:\Users\ka44\Documents\OneDrive - University of St Andrews\StAndrews\Work\BEB\Projects\Albumin\HSA\_EPR\HSA\_Q\KAq205\205\230215\_KAq205.3\_RIDME\_20\_50\_50000\_consensus\_DEER\_distribution.csv

### 3. Experimental and processing parameters

---

Fit and background in text format: C:\Users\ka44\Documents\OneDrive - University of St Andrews\StAndrews\Work\BEB\Projects\Albumin\HSA\_EPR\HSA\_Q\KAq205\205\230215\_KAq205.3\_RIDME\_20\_50\_50000\_consensus\_DEER\_fit.csv

Metadata: C:\Users\ka44\Documents\OneDrive - University of St Andrews\StAndrews\Work\BEB\Projects\Albumin\HSA\_EPR\HSA\_Q\KAq205\205\230215\_KAq205.3\_RIDME\_20\_50\_50000\_comparative\_DEER\_meta\_data.csv

# **DEER analysis report on dataset 230215\_KAq205.6\_RIDME\_18\_36\_36000**

**DEERNet Spinach SVN Rev 5662 and DeerLab  
0.9.1 Tikhonov regularization**

**ComparativeDEERAnalyzer version 2.0**

see: S. G. Worswick et al., DOI: 10.1126/sciadv.aat5218, L. Fabregas Ibanez et al., DOI: 10.5194/  
mr-1-209-2020

02-Mar-2023 14:08:09

---

## 1. Distance distributions

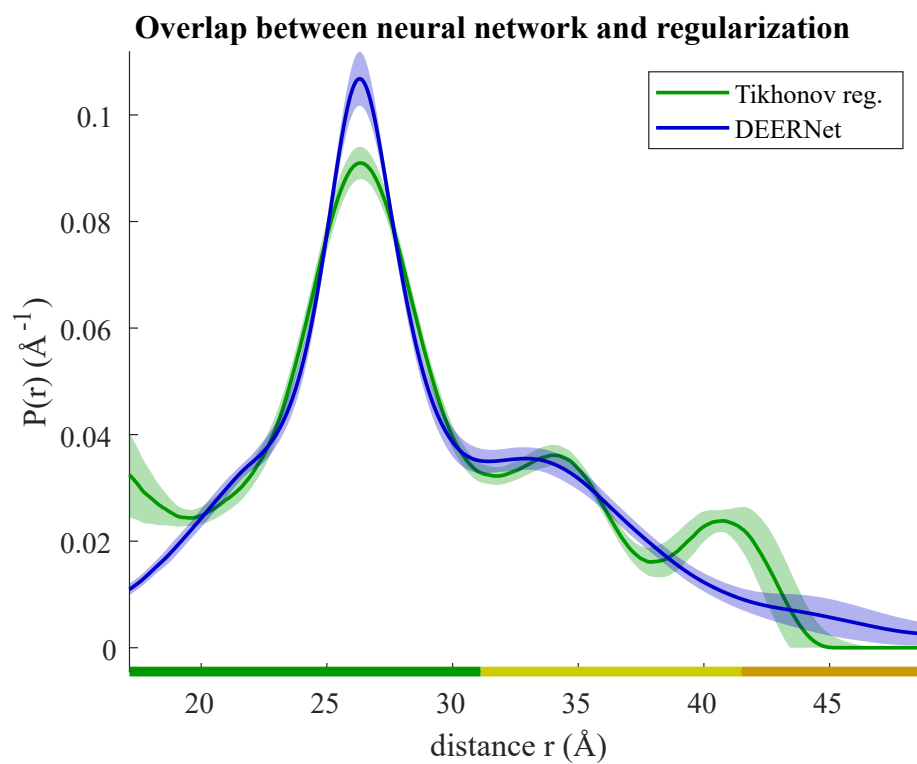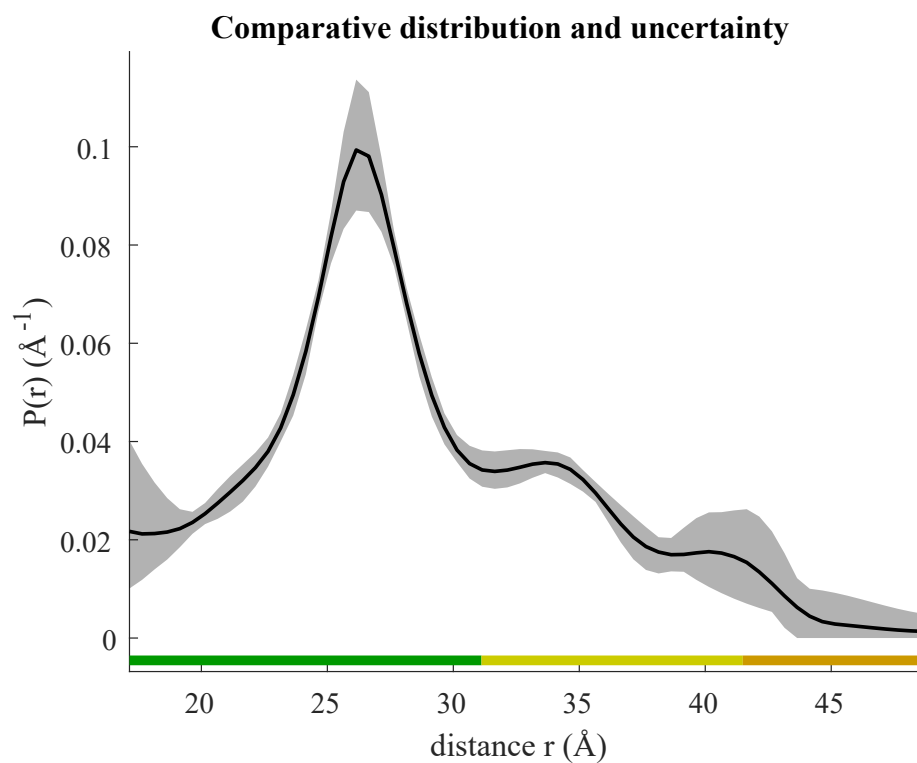

---

## 2. Fits of time-domain data

### DEERNet fits and background fits

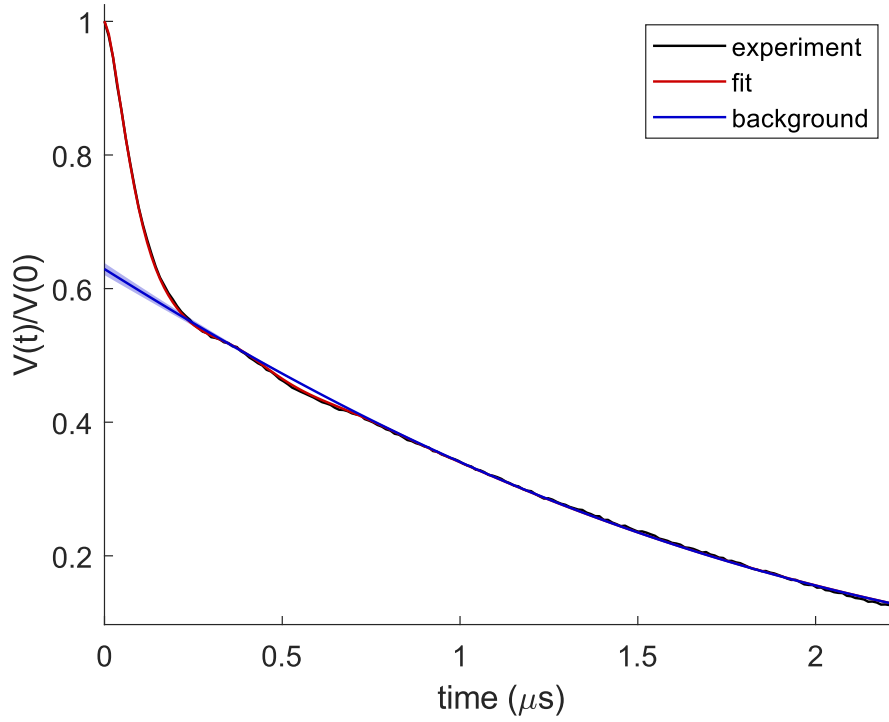

### Tikhonov fit

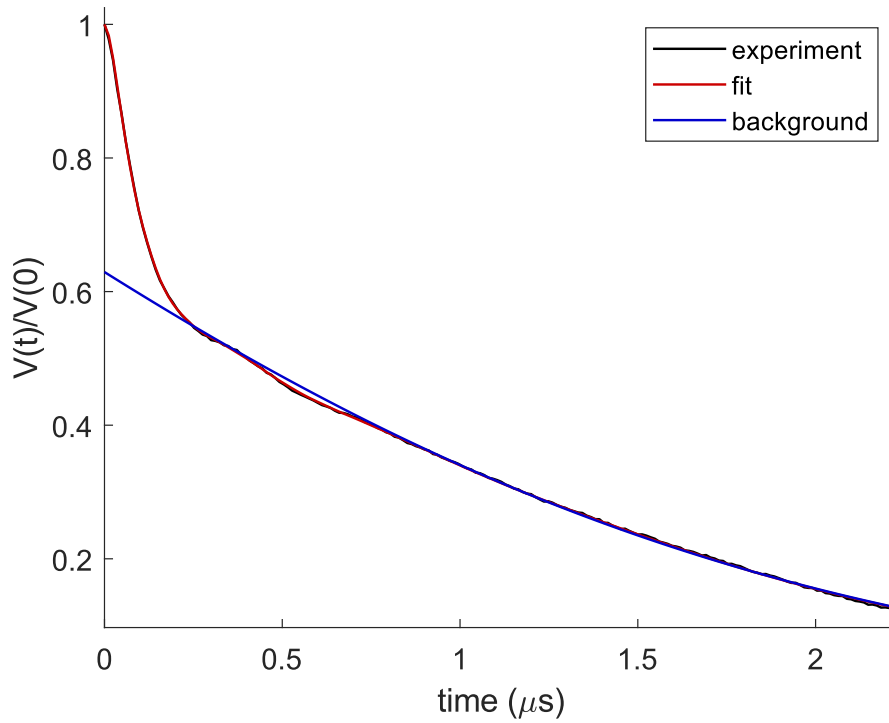



## 2. Fits of time-domain data

---

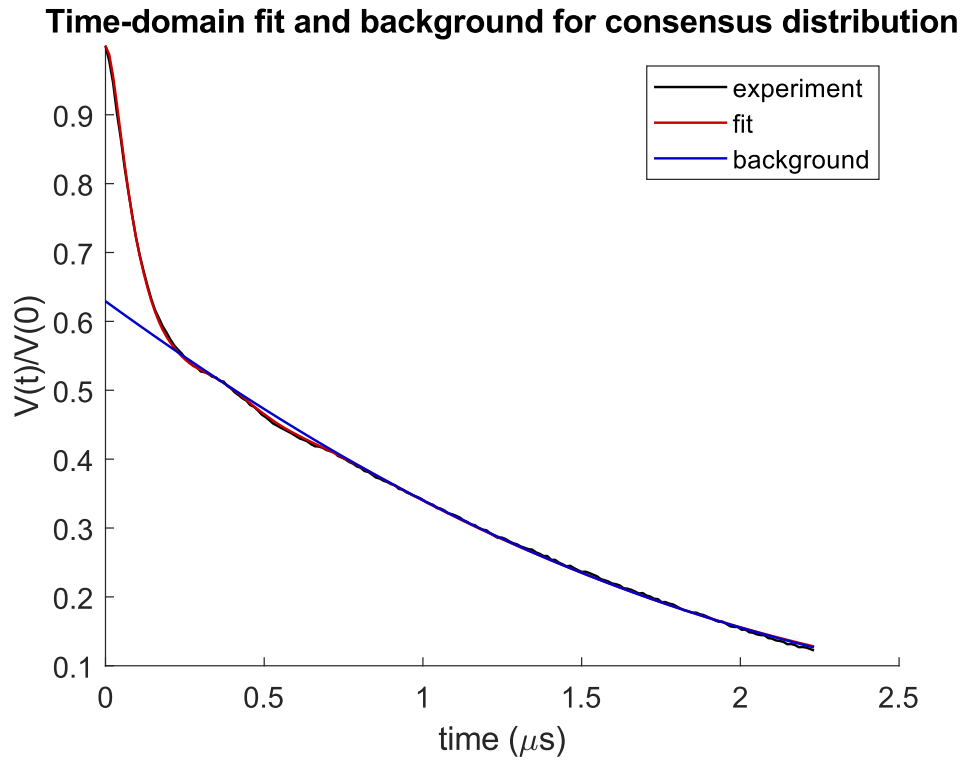

---

### 3. Experimental and processing parameters

**RIDME processing was requested. Only DEERNet output.**

Modulation depth: 0.371

Signal-to-noise ratio: 165.7 (w.r.t. modulation)

Noise estimates normalized to maximum signal

From imaginary part: 0.00000

From DEERNet fit: 0.00224

From Tikhonov fit: 0.00231

Zero time: 8 ns

Maximum time: 2232 ns

Time increment: 12 ns

Phase: 0.0 degree

Ensemble of 32 neural networks

Background separation by neural network

Background dimension: 3

Regularization parameter by best overlap with neural network solution

Regularization parameter used: 2.00

Reg. par. initial estimate by L-curve corner: 1.00

Overlap between DEERNet and regularization solutions: 0.921

Predicted overlap of consensus solution with ground truth: 0.79...0.96

Mean distance: 26.9 Å

Distance standard deviation: 8.0 Å

Full data set in Matlab format: C:\Users\ka44\Documents\OneDrive - University of St Andrews\StAndrews\Work\BEB\Projects\Albumin\HSA\_EPR\HSA\_Q\KAq205\205\230215\_KAq205.6\_RIDME\_18\_36\_36000\_comparative\_DEER\_analysis.mat

Distance distributions in text format: C:\Users\ka44\Documents\OneDrive - University of St Andrews\StAndrews\Work\BEB\Projects\Albumin\HSA\_EPR\HSA\_Q\KAq205\205\230215\_KAq205.6\_RIDME\_18\_36\_36000\_consensus\_DEER\_distribution.csv

### 3. Experimental and processing parameters

---

Fit and background in text format: C:\Users\ka44\Documents\OneDrive - University of St Andrews\StAndrews\Work\BEB\Projects\Albumin\HSA\_EPR\HSA\_Q\KAq205\205\230215\_KAq205.6\_RIDME\_18\_36\_36000\_consensus\_DEER\_fit.csv

Metadata: C:\Users\ka44\Documents\OneDrive - University of St Andrews\StAndrews\Work\BEB\Projects\Albumin\HSA\_EPR\HSA\_Q\KAq205\205\230215\_KAq205.6\_RIDME\_18\_36\_36000\_comparative\_DEER\_meta\_data.csv

# **DEER analysis report on dataset 230216\_KAq205.9\_RIDME\_28\_67\_67000**

**DEERNet Spinach SVN Rev 5662 and DeerLab  
0.9.1 Tikhonov regularization**

**ComparativeDEERAnalyzer version 2.0**

see: S. G. Worswick et al., DOI: 10.1126/sciadv.aat5218, L. Fabregas Ibanez et al., DOI: 10.5194/  
mr-1-209-2020

02-Mar-2023 14:11:32

---

## 1. Distance distributions

### Overlap between neural network and regularization

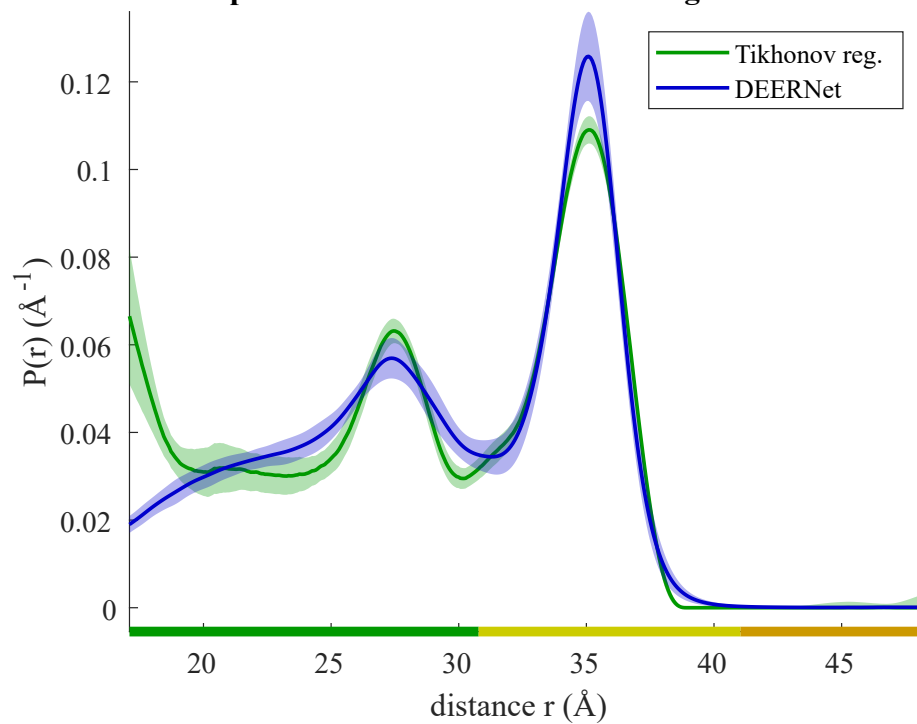

### Comparative distribution and uncertainty

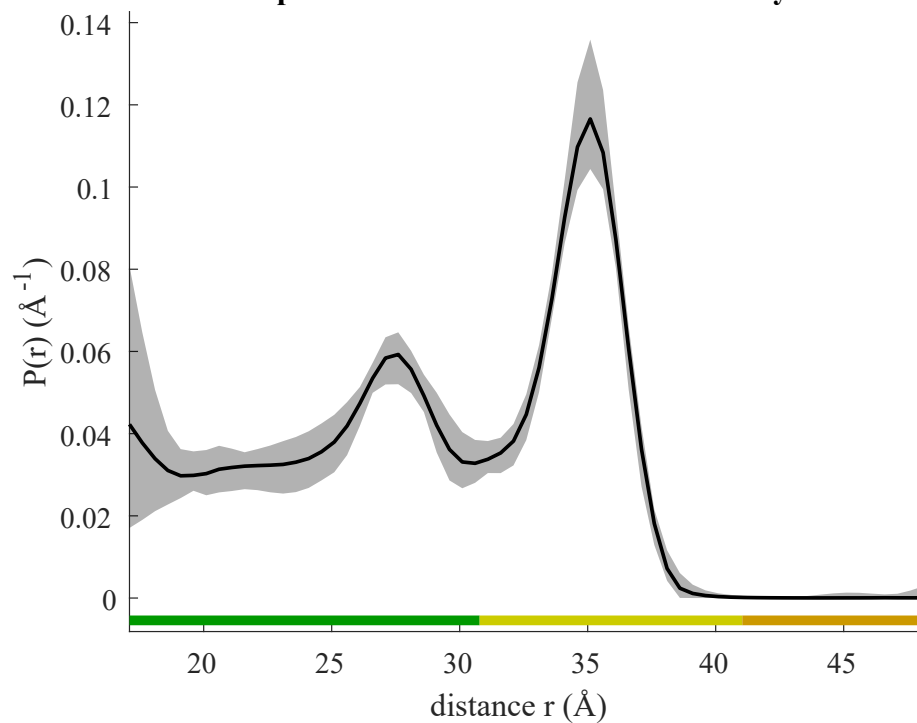

---

## 2. Fits of time-domain data

### DEERNet fits and background fits

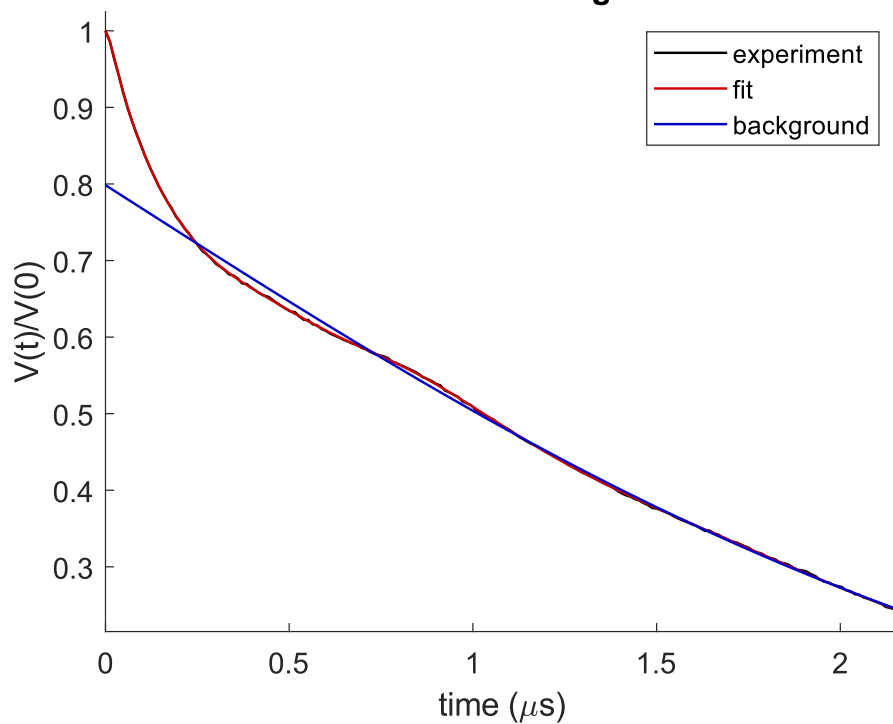

### Tikhonov fit

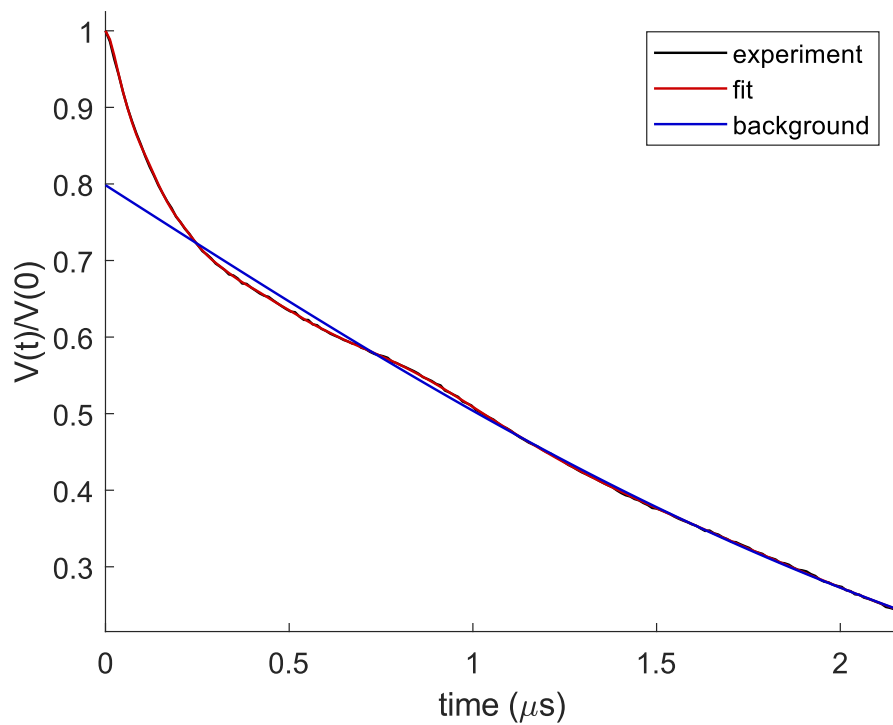

## 2. Fits of time-domain data

---

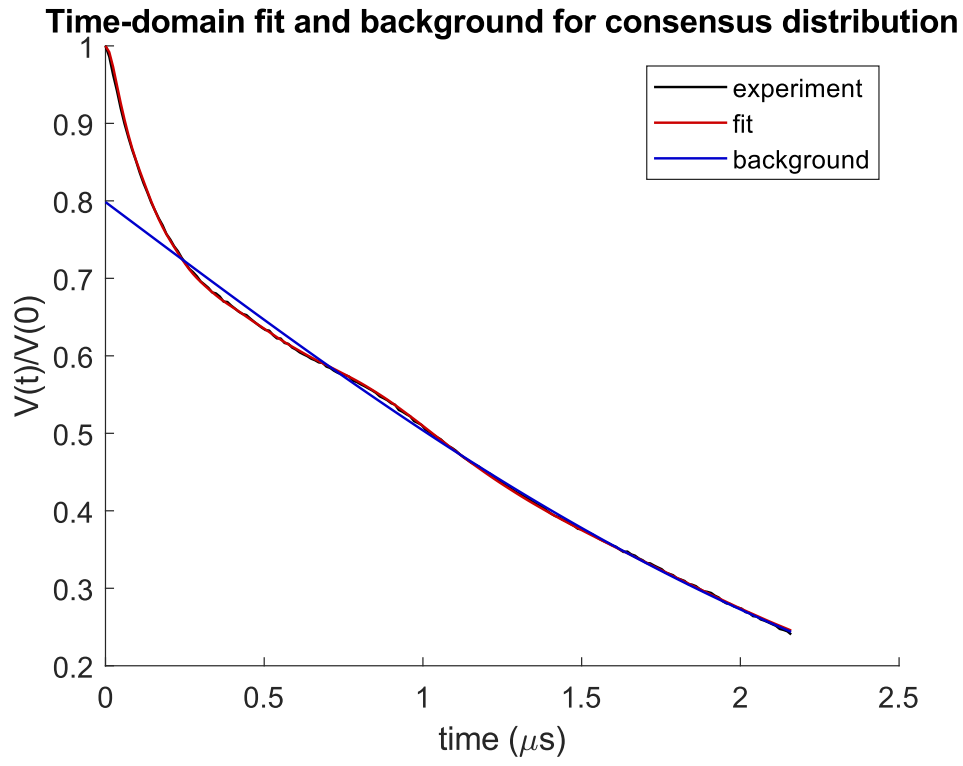

---

### 3. Experimental and processing parameters

**RIDME processing was requested. Only DEERNet output.**

Modulation depth: 0.201

Signal-to-noise ratio: 205.8 (w.r.t. modulation)

Noise estimates normalized to maximum signal

From imaginary part: 0.00000

From DEERNet fit: 0.00098

From Tikhonov fit: 0.00163

Zero time: 8 ns

Maximum time: 2160 ns

The last 3 % of the data was cut off

Time increment: 12 ns

Phase: 0.0 degree

Ensemble of 32 neural networks

Background separation by neural network

Background dimension: 3

Regularization parameter by best overlap with neural network solution

Regularization parameter used: 0.40

Reg. par. initial estimate by L-curve corner: 0.79

Overlap between DEERNet and regularization solutions: 0.928

Predicted overlap of consensus solution with ground truth: 0.80...0.97

Mean distance: 29.1 Å

Distance standard deviation: 6.8 Å

Full data set in Matlab format: C:\Users\ka44\Documents\OneDrive - University of St Andrews\StAndrews\Work\BEB\Projects\Albumin\HSA\_EPR\HSA\_Q\KAq205\205\230216\_KAq205.9\_RIDME\_28\_67\_67000\_comparative\_DEER\_analysis.mat

Distance distributions in text format: C:\Users\ka44\Documents\OneDrive - University of St Andrews\StAndrews\Work\BEB\Projects\Albumin\HSA\_EPR\HSA\_Q\KAq205\205\230216\_KAq205.9\_RIDME\_28\_67\_67000\_consensus\_DEER\_distribution.csv



### 3. Experimental and processing parameters

---

Fit and background in text format: C:\Users\ka44\Documents\OneDrive - University of St Andrews\StAndrews\Work\BEB\Projects\Albumin\HSA\_EPR\HSA\_Q\KAq205\205\230216\_KAq205.9\_RIDME\_28\_67\_67000\_consensus\_DEER\_fit.csv

Metadata: C:\Users\ka44\Documents\OneDrive - University of St Andrews\StAndrews\Work\BEB\Projects\Albumin\HSA\_EPR\HSA\_Q\KAq205\205\230216\_KAq205.9\_RIDME\_28\_67\_67000\_comparative\_DEER\_meta\_data.csv

# **DEER analysis report on dataset 230217\_KAq205.15\_RIDME\_28\_57\_57000**

**DEERNet Spinach SVN Rev 5662 and DeerLab  
0.9.1 Tikhonov regularization**

**ComparativeDEERAnalyzer version 2.0**

see: S. G. Worswick et al., DOI: 10.1126/sciadv.aat5218, L. Fabregas Ibanez et al., DOI: 10.5194/  
mr-1-209-2020

02-Mar-2023 14:37:34

---

## 1. Distance distributions

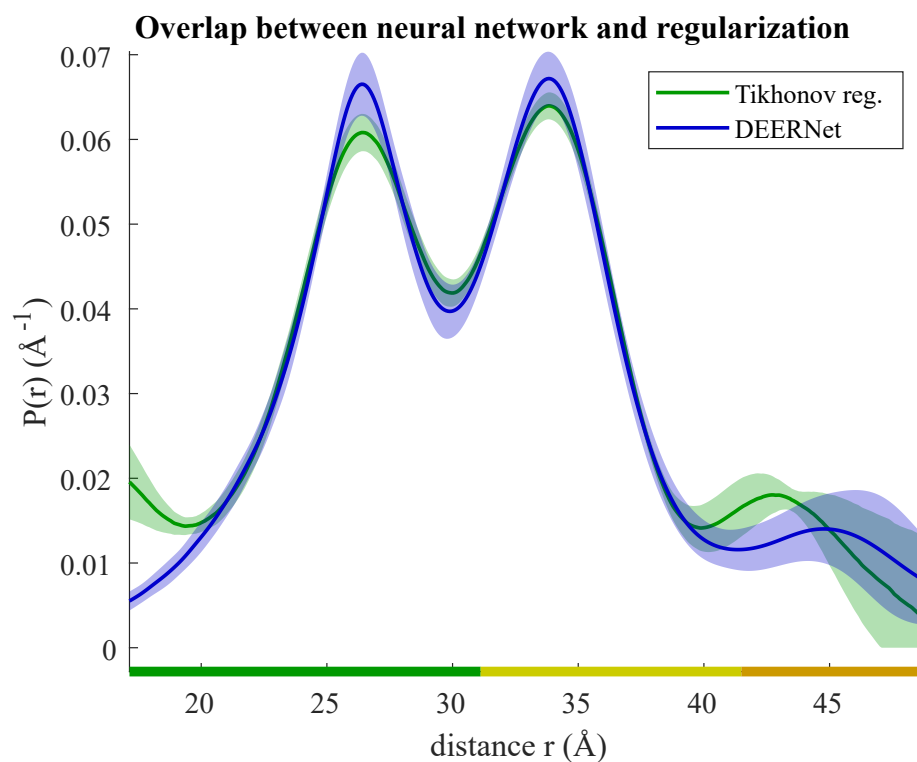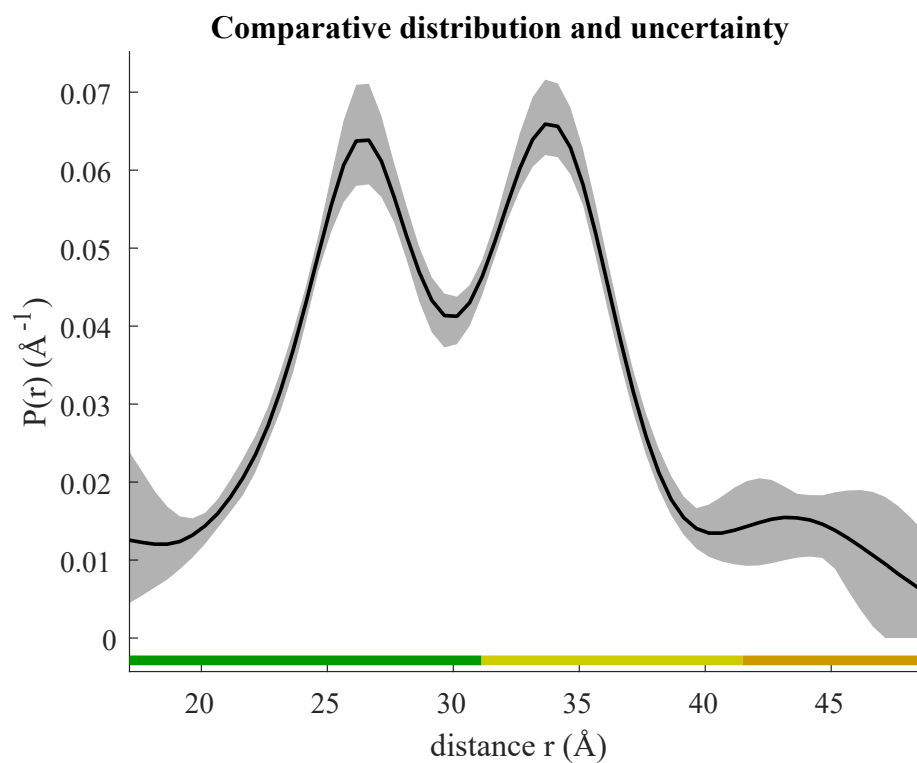

---

## 2. Fits of time-domain data

### DEERNet fits and background fits

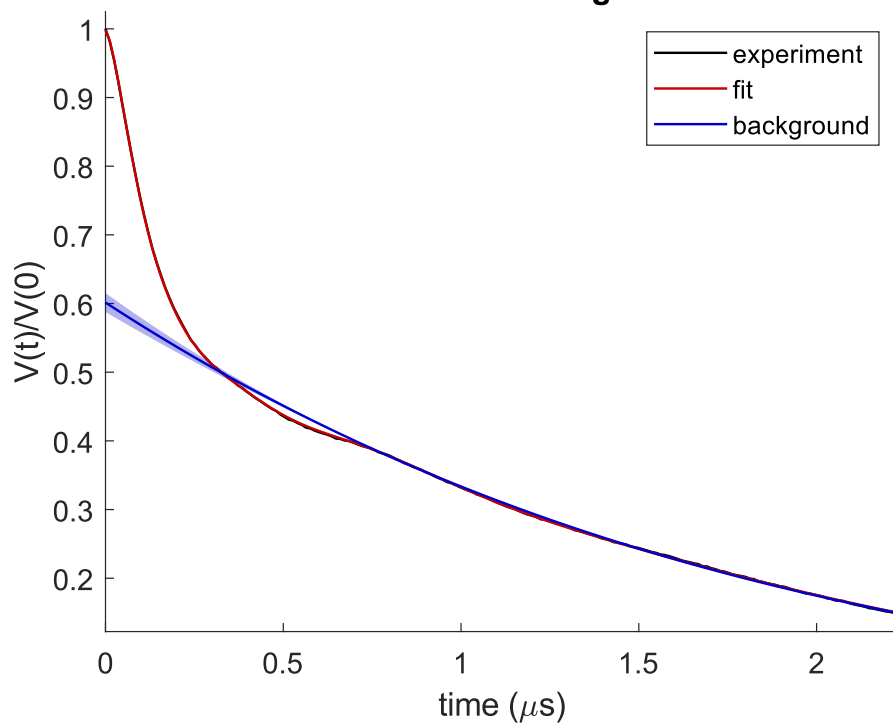

### Tikhonov fit

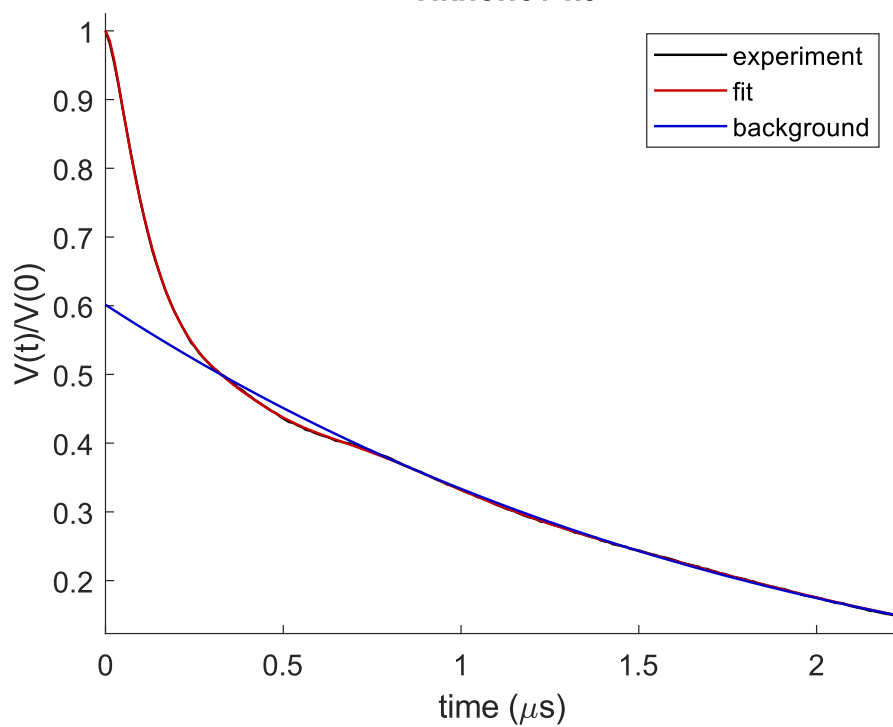

## 2. Fits of time-domain data

---

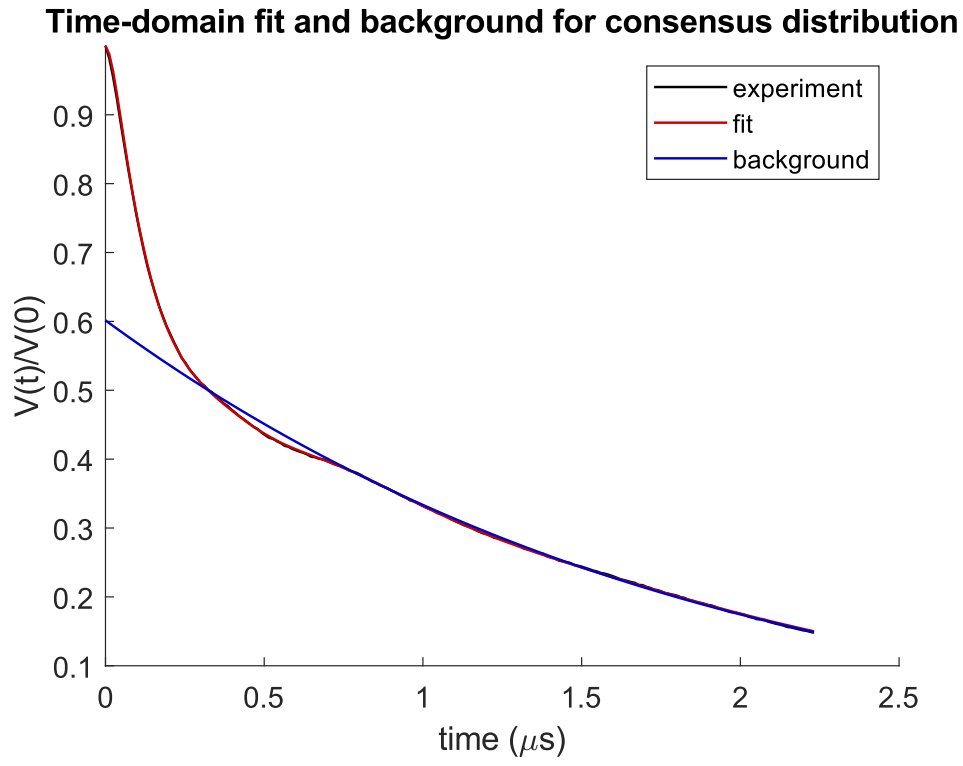

---

### 3. Experimental and processing parameters

**RIDME processing was requested. Only DEERNet output.**

Modulation depth: 0.397

Signal-to-noise ratio: 396.1 (w.r.t. modulation)

Noise estimates normalized to maximum signal

From imaginary part: 0.00000

From DEERNet fit: 0.00100

From Tikhonov fit: 0.00120

Zero time: 9 ns

Maximum time: 2232 ns

Time increment: 12 ns

Phase: 0.0 degree

Ensemble of 32 neural networks

Background separation by neural network

Background dimension: 3

Regularization parameter by best overlap with neural network solution

Regularization parameter used: 2.83

Reg. par. initial estimate by L-curve corner: 1.00

Overlap between DEERNet and regularization solutions: 0.958

Predicted overlap of consensus solution with ground truth: 0.82...0.99

Mean distance: 30.4 Å

Distance standard deviation: 7.8 Å

Full data set in Matlab format: C:\Users\ka44\Documents\OneDrive - University of St Andrews\StAndrews\Work\BEB\Projects\Albumin\HSA\_EPR\HSA\_Q\KAq205\205\230217\_KAq205.15\_RIDME\_28\_57\_57000\_comparative\_DEER\_analysis.mat

Distance distributions in text format: C:\Users\ka44\Documents\OneDrive - University of St Andrews\StAndrews\Work\BEB\Projects\Albumin\HSA\_EPR\HSA\_Q\KAq205\205\230217\_KAq205.15\_RIDME\_28\_57\_57000\_consensus\_DEER\_distribution.csv

### 3. Experimental and processing parameters

---

Fit and background in text format: C:\Users\ka44\Documents\OneDrive - University of St Andrews\StAndrews\Work\BEB\Projects\Albumin\HSA\_EPR\HSA\_Q\KAq205\205\230217\_KAq205.15\_RIDME\_28\_57\_57000\_consensus\_DEER\_fit.csv

Metadata: C:\Users\ka44\Documents\OneDrive - University of St Andrews\StAndrews\Work\BEB\Projects\Albumin\HSA\_EPR\HSA\_Q\KAq205\205\230217\_KAq205.15\_RIDME\_28\_57\_57000\_comparative\_DEER\_meta\_data.csv

# **DEER analysis report on dataset 230216\_KAq205.12\_RIDME\_26\_55\_55000**

**DEERNet Spinach SVN Rev 5662 and DeerLab  
0.9.1 Tikhonov regularization**

**ComparativeDEERAnalyzer version 2.0**

see: S. G. Worswick et al., DOI: 10.1126/sciadv.aat5218, L. Fabregas Ibanez et al., DOI: 10.5194/  
mr-1-209-2020

02-Mar-2023 14:14:48



---

## 1. Distance distributions

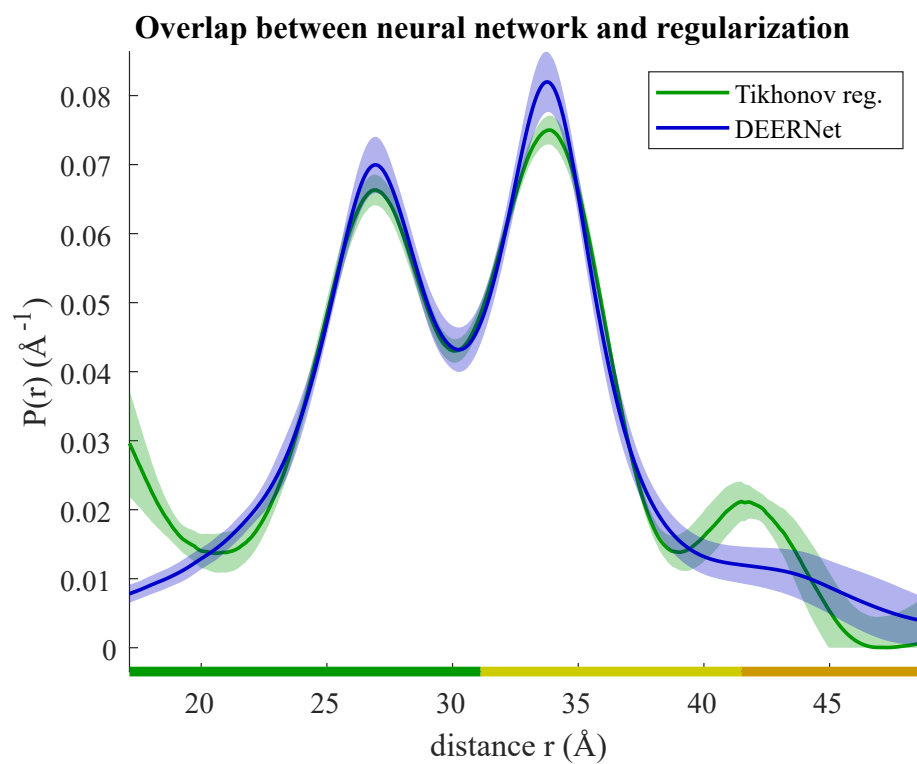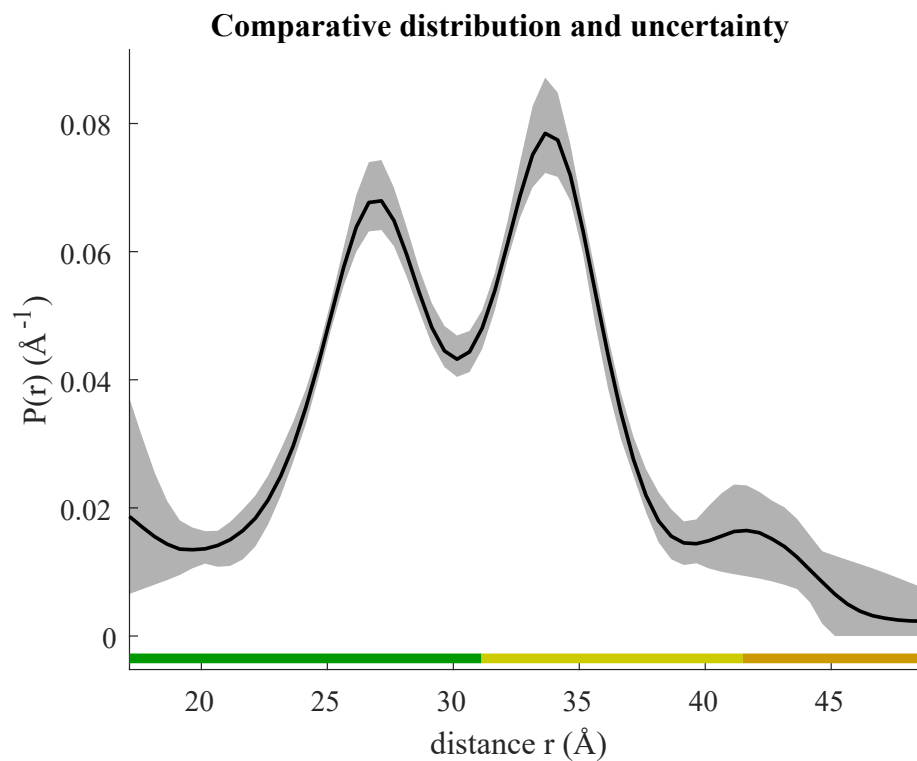

---

## 2. Fits of time-domain data

### DEERNet fits and background fits

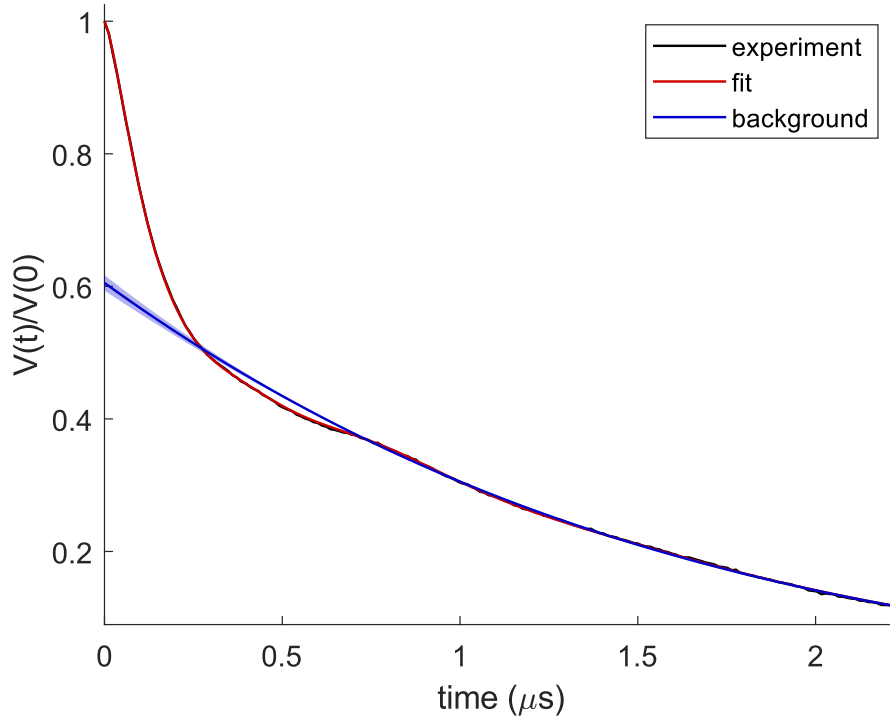

### Tikhonov fit

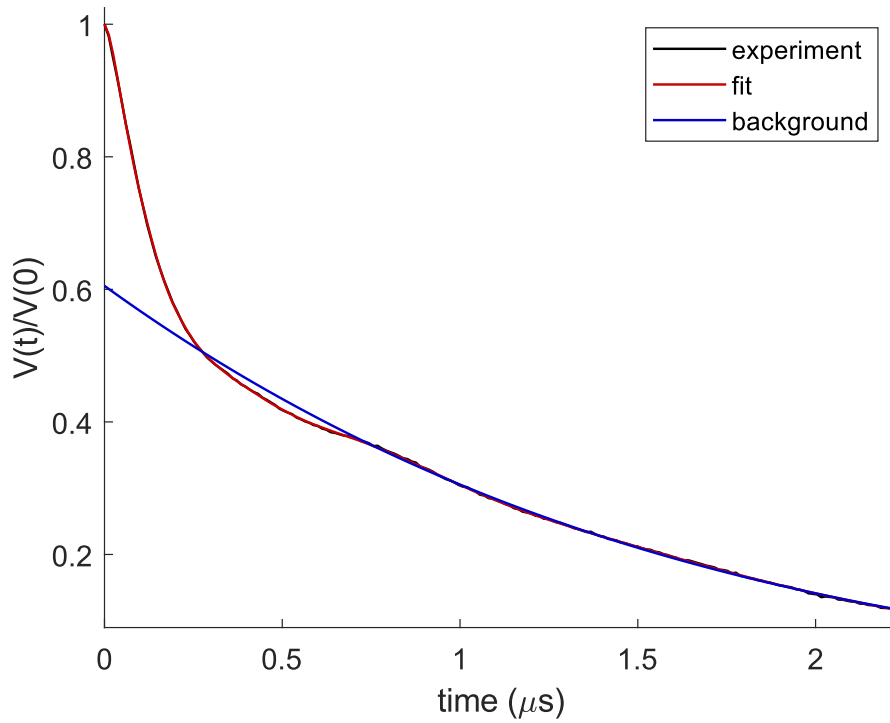

## 2. Fits of time-domain data

---

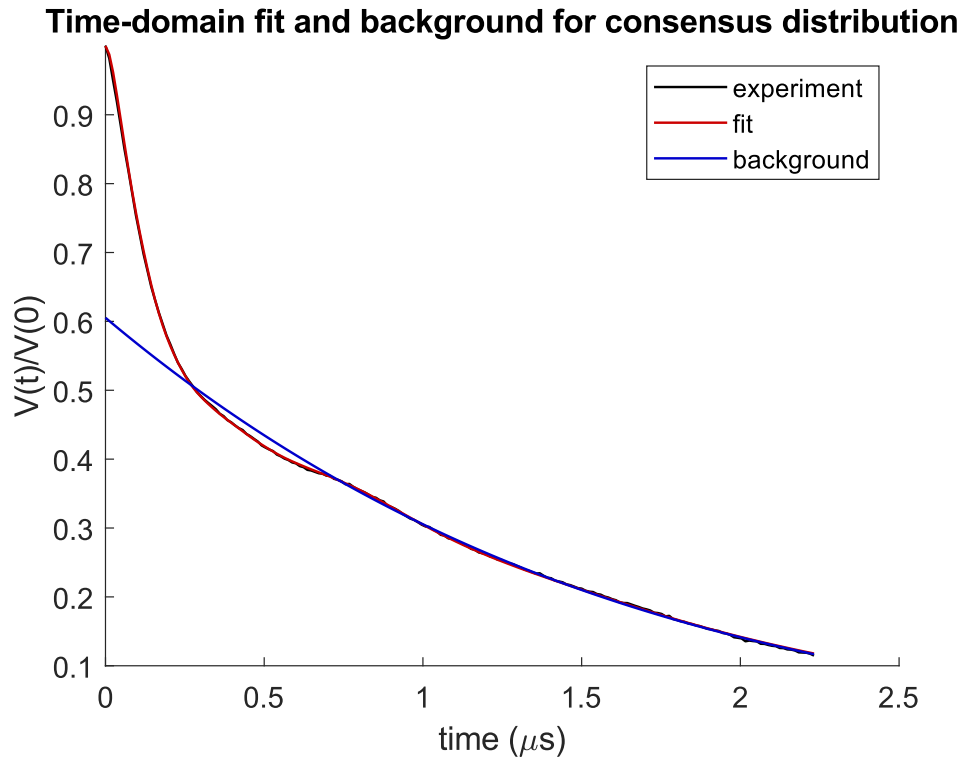

---

### 3. Experimental and processing parameters

**RIDME processing was requested. Only DEERNet output.**

Modulation depth: 0.395

Signal-to-noise ratio: 306.0 (w.r.t. modulation)

Noise estimates normalized to maximum signal

From imaginary part: 0.00000

From DEERNet fit: 0.00129

From Tikhonov fit: 0.00152

Zero time: 9 ns

Maximum time: 2232 ns

Time increment: 12 ns

Phase: 0.0 degree

Ensemble of 32 neural networks

Background separation by neural network

Background dimension: 3

Regularization parameter by best overlap with neural network solution

Regularization parameter used: 1.78

Reg. par. initial estimate by L-curve corner: 1.26

Overlap between DEERNet and regularization solutions: 0.940

Predicted overlap of consensus solution with ground truth: 0.81...0.98

Mean distance: 30.4 Å

Distance standard deviation: 6.7 Å

Full data set in Matlab format: C:\Users\ka44\Documents\OneDrive - University of St Andrews\StAndrews\Work\BEB\Projects\Albumin\HSA\_EPR\HSA\_Q\KAq205\205\230216\_KAq205.12\_RIDME\_26\_55\_55000\_comparative\_DEER\_analysis.mat

Distance distributions in text format: C:\Users\ka44\Documents\OneDrive - University of St Andrews\StAndrews\Work\BEB\Projects\Albumin\HSA\_EPR\HSA\_Q\KAq205\205\230216\_KAq205.12\_RIDME\_26\_55\_55000\_consensus\_DEER\_distribution.csv

### 3. Experimental and processing parameters

---

Fit and background in text format: C:\Users\ka44\Documents\OneDrive - University of St Andrews\StAndrews\Work\BEB\Projects\Albumin\HSA\_EPR\HSA\_Q\KAq205\205\230216\_KAq205.12\_RIDME\_26\_55\_55000\_consensus\_DEER\_fit.csv

Metadata: C:\Users\ka44\Documents\OneDrive - University of St Andrews\StAndrews\Work\BEB\Projects\Albumin\HSA\_EPR\HSA\_Q\KAq205\205\230216\_KAq205.12\_RIDME\_26\_55\_55000\_comparative\_DEER\_meta\_data.csv

# **DEER analysis report on dataset 230618\_BEBQ82.6\_RIDME**

**DEERNet Spinach SVN Rev 5662 and DeerLab  
0.9.1 Tikhonov regularization**

**ComparativeDEERAnalyzer version 2.0**

see: S. G. Worswick et al., DOI: 10.1126/sciadv.aat5218, L. Fabregas Ibanez et al., DOI: 10.5194/  
mr-1-209-2020

13-Sep-2023 14:58:00

---

## 1. Distance distributions

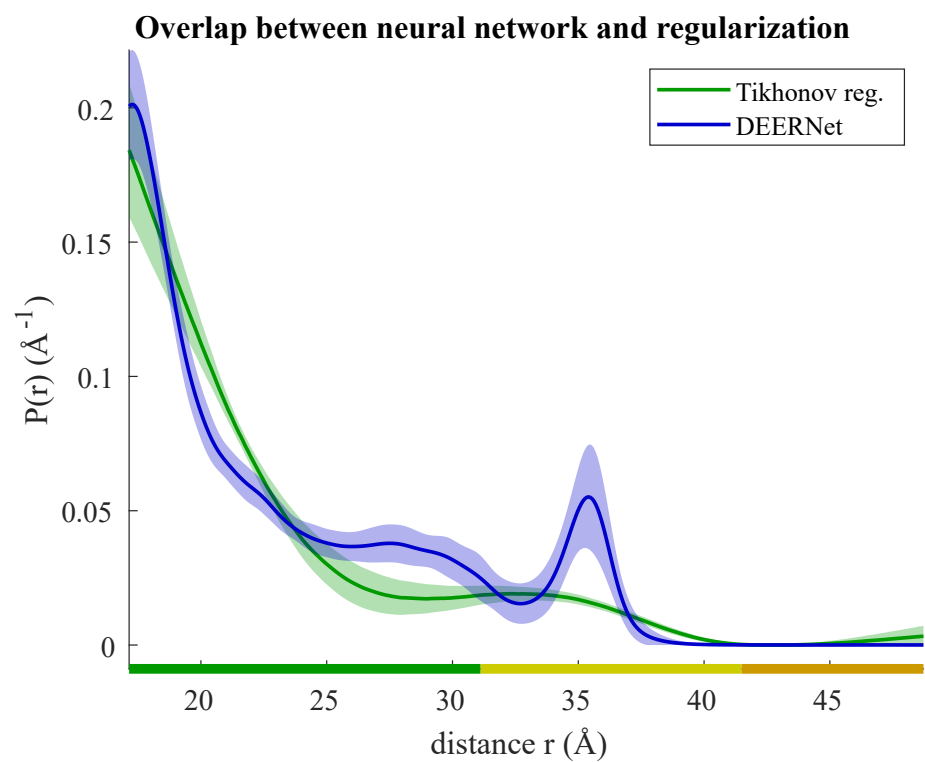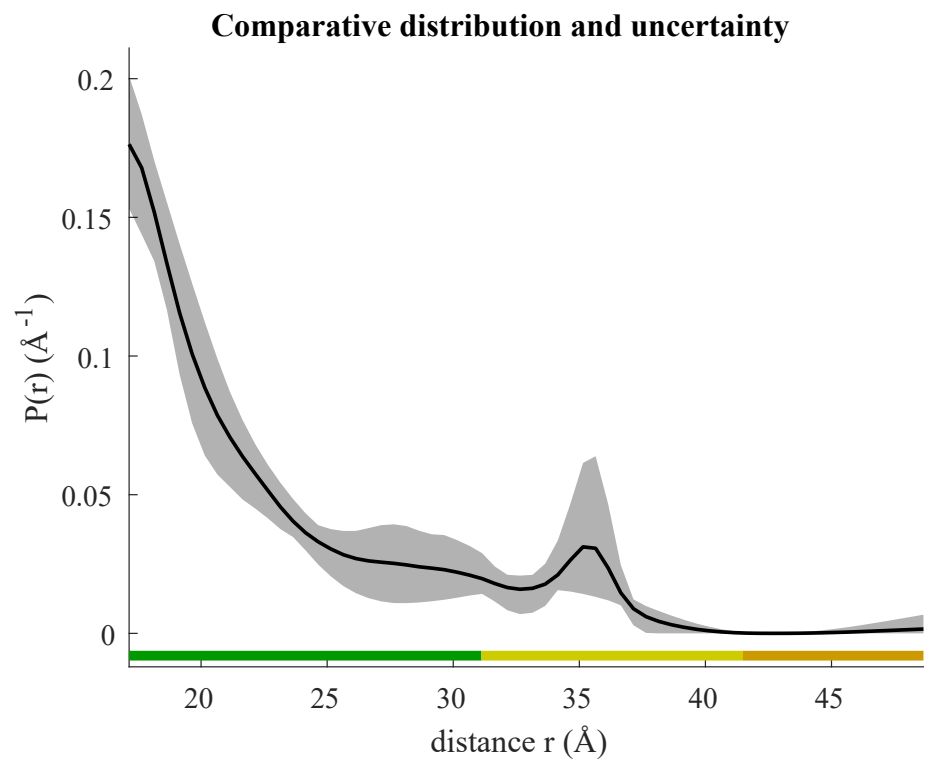

---

## 2. Fits of time-domain data

### DEERNet fits and background fits

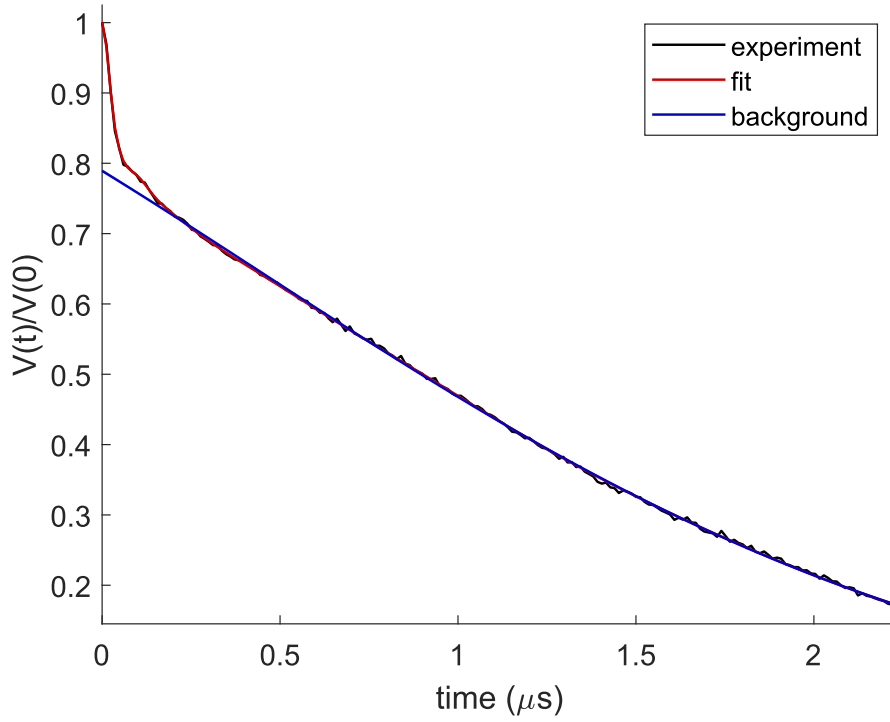

### Tikhonov fit

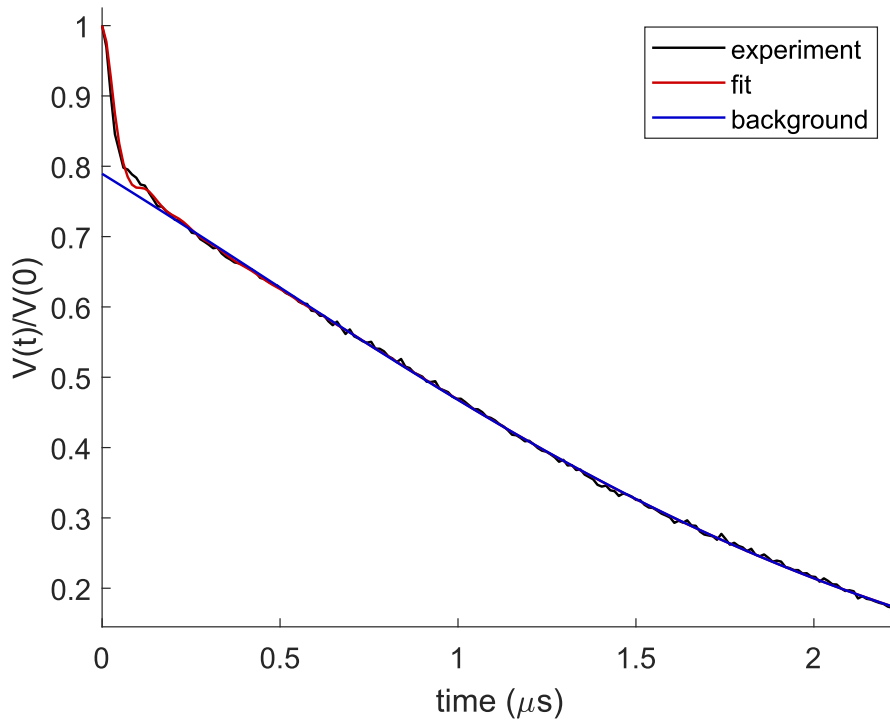



## 2. Fits of time-domain data

---

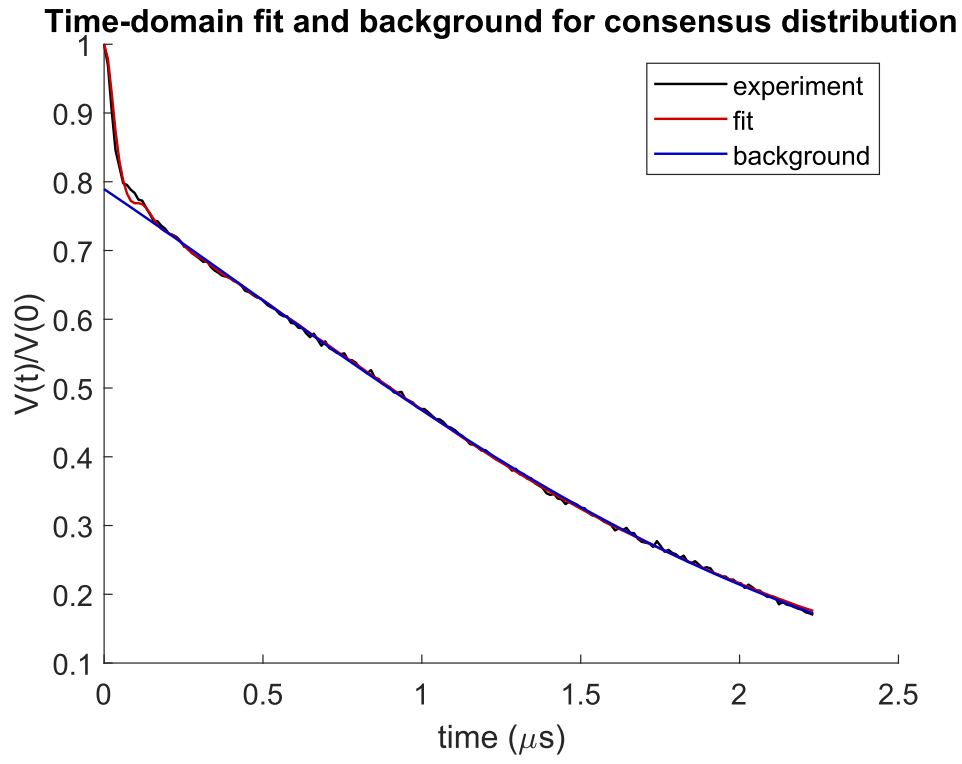

---

### 3. Experimental and processing parameters

**RIDME processing was requested. Only DEERNet output.**

Modulation depth: 0.211

Signal-to-noise ratio: 78.7 (w.r.t. modulation)

Noise estimates normalized to maximum signal

From imaginary part: 0.00346

From DEERNet fit: 0.00269

From Tikhonov fit: 0.00496

Zero time: 14 ns

Maximum time: 2232 ns

Time increment: 12 ns

Phase: 1.7 degree

Ensemble of 32 neural networks

Background separation by neural network

Background dimension: 3

Regularization parameter by best overlap with neural network solution

Regularization parameter used: 15.96

Reg. par. initial estimate by L-curve corner: 2.00

Overlap between DEERNet and regularization solutions: 0.861

Predicted overlap of consensus solution with ground truth: 0.73...0.90

**Mean distance: 23.1 Å**

**Single Gaussian provided different mean distance. Distribution may be incomplete.**

Distance standard deviation: 6.0 Å

Full data set in Matlab format: C:\Users\Katrin\OneDrive - University of St Andrews\StAndrews\Work\BEB\Projects\Albumin\HSA\_EPR\HSA\_Q\H288A\_2eqCu\230618\_BEBQ82.6\_RIDME\_comparative\_DEER\_analysis.mat

Distance distributions in text format: C:\Users\Katrin\OneDrive - University of St Andrews\StAndrews\Work\BEB\Projects\Albumin\HSA\_EPR\HSA\_Q\H288A\_2eqCu\230618\_BEBQ82.6\_RIDME\_consensus\_DEER\_distribution.csv

### 3. Experimental and processing parameters

---

Fit and background in text format: C:\Users\KatrIn\OneDrive - University of St Andrews\StAndrews\Work\BEB\Projects\Albumin\HSA\_EPR\HSA\_Q\H288A\_2eqCu\230618\_BEBQ82.6\_RIDME\_consensus\_DEER\_fit.csv

Metadata: C:\Users\KatrIn\OneDrive - University of St Andrews\StAndrews\Work\BEB\Projects\Albumin\HSA\_EPR\HSA\_Q\H288A\_2eqCu\230618\_BEBQ82.6\_RIDME\_comparative\_DEER\_meta\_data.csv
